# Supplementary material for: Characterization of human transcription factor function and patterns of gene regulation in HepG2 cells
Source: Genome Res. 2023 Nov;33(11):1879–92. doi: 10.1101/gr.278205.123 (PMC10760452; doi:10.1101/gr.278205.123)
Supplement: Supplement 3 [file Supplemental_Tables.xlsx]

## Sheet: Supplemental Table 1
Supplemental Table 1. DAPs and histones included in this study, their classification, and their locations for download or access.
Factor	Tag	Preferred_NonPref	peakLocation	Final.HA.Annotation	Lambert2018.TF.NotTF	Notes	go_anno	orthologous_group
ADNP	FLAG	Preferred	https://www.encodeproject.org/files/ENCFF962QOB/@@download/ENCFF962QOB.bed.gz	TF	Yes		transcription factor	COG1219
AFF1	FLAG	Preferred	https://www.ncbi.nlm.nih.gov/geo/download/?acc=GSM7503103&format=file&file=GSM7503103%5FAFF1%2DFLAG%5FPreferred%5FLocal%2EnarrowPeak%2Egz	Other	No		transcription factor	COG3170
AFF4	FLAG	Preferred	https://www.encodeproject.org/files/ENCFF423ZMT/@@download/ENCFF423ZMT.bed.gz	Other	No		transcription factor	COG3170
AGO1		Preferred	https://www.encodeproject.org/files/ENCFF130JQD/@@download/ENCFF130JQD.bed.gz	Other		Argonaute	RNA binding protein,transcription factor	COG2304
AGO2		Preferred	https://www.encodeproject.org/files/ENCFF348MDS/@@download/ENCFF348MDS.bed.gz	Other		Argonaute	RNA binding protein,transcription factor	COG0438
AHDC1	FLAG	Preferred	https://www.encodeproject.org/files/ENCFF418EWE/@@download/ENCFF418EWE.bed.gz	TF	Yes		transcription factor	COG3266
AHR	FLAG	Preferred	https://www.encodeproject.org/files/ENCFF674NDV/@@download/ENCFF674NDV.bed.gz	TF	Yes		transcription factor	COG2205
AKAP8	FLAG	Preferred	https://www.encodeproject.org/files/ENCFF540SLC/@@download/ENCFF540SLC.bed.gz	TF	Yes		RNA binding protein	COG1403
AKNA	FLAG	Preferred	https://www.encodeproject.org/files/ENCFF579OCV/@@download/ENCFF579OCV.bed.gz	TF	Yes		transcription factor	COG1196
ARID3A		Preferred	https://www.encodeproject.org/files/ENCFF694XNQ/@@download/ENCFF694XNQ.bed.gz	TF	Yes		transcription factor	COG3170
ARID4A	FLAG	Preferred	https://www.encodeproject.org/files/ENCFF575UZO/@@download/ENCFF575UZO.bed.gz	Other	No		transcription factor	COG1196
ARID4B	FLAG	Preferred	https://www.encodeproject.org/files/ENCFF434BGG/@@download/ENCFF434BGG.bed.gz	Other	No		transcription factor	COG2433
ARID5B	FLAG	Preferred	https://www.encodeproject.org/files/ENCFF122HBJ/@@download/ENCFF122HBJ.bed.gz	TF	Yes		transcription factor	COG0631
ARNT		Preferred	https://www.encodeproject.org/files/ENCFF055JFR/@@download/ENCFF055JFR.bed.gz	TF	Yes		transcription factor	COG1520
BMAL1	FLAG	Preferred	https://www.encodeproject.org/files/ENCFF049HEP/@@download/ENCFF049HEP.bed.gz	TF	Yes		transcription factor	COG1028
ASH2L		Preferred	https://www.encodeproject.org/files/ENCFF248IAZ/@@download/ENCFF248IAZ.bed.gz	TF			transcription factor,chromatin remodeller	COG1198
ATAD3A	FLAG	Preferred	https://www.encodeproject.org/files/ENCFF253ECF/@@download/ENCFF253ECF.bed.gz	Other			transcription factor	COG0465
ATF1	FLAG	Preferred	https://www.encodeproject.org/files/ENCFF363ZSJ/@@download/ENCFF363ZSJ.bed.gz	TF	Yes		transcription factor	COG1404
ATF2		Non-preferred	https://www.encodeproject.org/files/ENCFF737KKO/@@download/ENCFF737KKO.bed.gz	TF	Yes		transcription factor	COG3206
ATF2	FLAG	Preferred	https://www.encodeproject.org/files/ENCFF865OTB/@@download/ENCFF865OTB.bed.gz	TF	Yes		transcription factor	COG3206
ATF3	FLAG	Non-preferred	https://www.encodeproject.org/files/ENCFF891BJN/@@download/ENCFF891BJN.bed.gz	TF	Yes		transcription factor	COG1196
ATF3		Preferred	https://www.encodeproject.org/files/ENCFF681PQB/@@download/ENCFF681PQB.bed.gz	TF	Yes		transcription factor	COG1196
ATF4	eGFP	Preferred	https://www.encodeproject.org/files/ENCFF690CMF/@@download/ENCFF690CMF.bed.gz	TF	Yes		transcription factor	COG3170
ATF5	FLAG	Preferred	https://www.encodeproject.org/files/ENCFF166CIL/@@download/ENCFF166CIL.bed.gz	TF	Yes		transcription factor	COG3599
ATF6	FLAG	Preferred	https://www.encodeproject.org/files/ENCFF463GXC/@@download/ENCFF463GXC.bed.gz	TF	Yes		transcription factor	COG3170
ATF7		Preferred	https://www.encodeproject.org/files/ENCFF753DBF/@@download/ENCFF753DBF.bed.gz	TF	Yes		transcription factor	COG3206
ATF7	FLAG	Non-preferred	https://www.encodeproject.org/files/ENCFF276IMS/@@download/ENCFF276IMS.bed.gz	TF	Yes		transcription factor	COG3206
ATM		Preferred	https://www.encodeproject.org/files/ENCFF902IRY/@@download/ENCFF902IRY.bed.gz	Other	No		transcription factor	2Z86R
ATRX	FLAG	Preferred	https://www.encodeproject.org/files/ENCFF674JQI/@@download/ENCFF674JQI.bed.gz	Other	No		transcription factor	COG0553
BAZ2A	FLAG	Preferred	https://www.ncbi.nlm.nih.gov/geo/download/?acc=GSM7503104&format=file&file=GSM7503104%5FBAZ2A%2DFLAG%5FPreferred%5FLocal%2EnarrowPeak%2Egz	TF	Yes		transcription factor	COG0457
BCL3	FLAG	Preferred	https://www.encodeproject.org/files/ENCFF731MBF/@@download/ENCFF731MBF.bed.gz	Other	No		transcription factor	COG0666
BCL6	FLAG	Preferred	https://www.encodeproject.org/files/ENCFF932UJW/@@download/ENCFF932UJW.bed.gz	TF	Yes		transcription factor	COG1403
BCLAF1		Preferred	https://www.encodeproject.org/files/ENCFF491DYX/@@download/ENCFF491DYX.bed.gz	Other	No		RNA binding protein,transcription factor	COG1403
BHLHE40		Non-preferred	https://www.encodeproject.org/files/ENCFF263AYI/@@download/ENCFF263AYI.bed.gz	TF	Yes		transcription factor	COG0550
BHLHE40		Preferred	https://www.encodeproject.org/files/ENCFF268DXL/@@download/ENCFF268DXL.bed.gz	TF	Yes		transcription factor	COG0550
BRCA1		Non-preferred	https://www.encodeproject.org/files/ENCFF733IVW/@@download/ENCFF733IVW.bed.gz	Other	No		transcription factor	COG2378
BRCA1	FLAG	Preferred	https://www.encodeproject.org/files/ENCFF237LPI/@@download/ENCFF237LPI.bed.gz	Other	No		transcription factor	COG2378
BRD4	FLAG	Preferred	https://www.encodeproject.org/files/ENCFF119YIG/@@download/ENCFF119YIG.bed.gz	Other	No		transcription factor,chromatin remodeller	COG3170
BRD4		Non-preferred	https://www.encodeproject.org/files/ENCFF262TAP/@@download/ENCFF262TAP.bed.gz	Other	No		transcription factor,chromatin remodeller	COG3170
CAMTA1	FLAG	Preferred	https://www.ncbi.nlm.nih.gov/geo/download/?acc=GSM7503105&format=file&file=GSM7503105%5FCAMTA1%2DFLAG%5FPreferred%5FLocal%2EnarrowPeak%2Egz	TF	Yes		transcription factor	COG5492
CAMTA2	FLAG	Preferred	https://www.encodeproject.org/files/ENCFF488RBR/@@download/ENCFF488RBR.bed.gz	TF	Yes		transcription factor	COG0286
CBFB	FLAG	Preferred	https://www.encodeproject.org/files/ENCFF389HNP/@@download/ENCFF389HNP.bed.gz	Other	No		transcription factor	COG0572
CBX2		Preferred	https://www.encodeproject.org/files/ENCFF670RQW/@@download/ENCFF670RQW.bed.gz	Other	Yes*	Chromatin remodeller	transcription factor,chromatin remodeller	COG1403
CBX5	FLAG	Preferred	https://www.encodeproject.org/files/ENCFF574QKP/@@download/ENCFF574QKP.bed.gz	Other			transcription factor,chromatin remodeller	COG4227
CCAR2		Preferred	https://www.encodeproject.org/files/ENCFF504CCV/@@download/ENCFF504CCV.bed.gz	Other			RNA binding protein,transcription factor	COG1196
CEBPA	FLAG	Preferred	https://www.encodeproject.org/files/ENCFF713MLA/@@download/ENCFF713MLA.bed.gz	TF	Yes		transcription factor	COG3599
CEBPB		Preferred	https://www.encodeproject.org/files/ENCFF886PVT/@@download/ENCFF886PVT.bed.gz	TF	Yes		transcription factor	COG3206
CEBPB		Non-preferred	https://www.encodeproject.org/files/ENCFF717JGJ/@@download/ENCFF717JGJ.bed.gz	TF	Yes		transcription factor	COG3206
CEBPD	FLAG	Preferred	https://www.encodeproject.org/files/ENCFF784EXR/@@download/ENCFF784EXR.bed.gz	TF	Yes		transcription factor	COG1196
CEBPG	FLAG	Preferred	https://www.encodeproject.org/files/ENCFF642FIX/@@download/ENCFF642FIX.bed.gz	TF	Yes		transcription factor	COG1196
CEBPZ		Preferred	https://www.encodeproject.org/files/ENCFF589EAS/@@download/ENCFF589EAS.bed.gz	TF	Yes		RNA binding protein,transcription factor	COG1413
CENPBD1P	FLAG	Preferred	https://www.ncbi.nlm.nih.gov/geo/download/?acc=GSM7503106&format=file&file=GSM7503106%5FCENPBD1%2DFLAG%5FPreferred%5FLocal%2EnarrowPeak%2Egz	TF	Yes		transcription factor
CENPX	FLAG	Preferred	https://www.ncbi.nlm.nih.gov/geo/download/?acc=GSM7503107&format=file&file=GSM7503107%5FCENPX%2DFLAG%5FPreferred%5FLocal%2EnarrowPeak%2Egz	Other	Yes*	Does not bind DNA on its own.		COG5464
CERS6	FLAG	Preferred	https://www.encodeproject.org/files/ENCFF188ULF/@@download/ENCFF188ULF.bed.gz	Other	No		transcription factor	COG1835
CHD2		Preferred	https://www.encodeproject.org/files/ENCFF369UGC/@@download/ENCFF369UGC.bed.gz	Other	No		RNA binding protein,transcription factor	COG0553
CHD4		Preferred	https://www.encodeproject.org/files/ENCFF927XNA/@@download/ENCFF927XNA.bed.gz	Other	No		transcription factor,chromatin remodeller,RNA binding protein	COG0553
CREB1	FLAG	Uncharacterized	https://www.encodeproject.org/files/ENCFF648PUH/@@download/ENCFF648PUH.bed.gz	TF	Yes		transcription factor	COG3266
CREB1		Preferred	https://www.encodeproject.org/files/ENCFF852AAQ/@@download/ENCFF852AAQ.bed.gz	TF	Yes		transcription factor	COG3266
CREB1		Uncharacterized	https://www.encodeproject.org/files/ENCFF564YGY/@@download/ENCFF564YGY.bed.gz	TF	Yes		transcription factor	COG3266
CREB3	FLAG	Preferred	https://www.encodeproject.org/files/ENCFF792EMG/@@download/ENCFF792EMG.bed.gz	TF	Yes		transcription factor	COG4372
CREM		Non-preferred	https://www.encodeproject.org/files/ENCFF092MMG/@@download/ENCFF092MMG.bed.gz	TF	Yes		transcription factor	COG2919
CREM	FLAG	Preferred	https://www.encodeproject.org/files/ENCFF847YQG/@@download/ENCFF847YQG.bed.gz	TF	Yes		transcription factor	COG2919
YBX3	FLAG	Preferred	https://www.ncbi.nlm.nih.gov/geo/download/?acc=GSM7503108&format=file&file=GSM7503108%5FCSDA%2DFLAG%5FPreferred%5FLocal%2EnarrowPeak%2Egz	TF	Yes	AKA YBX3	RNA binding protein,transcription factor
CTCF	FLAG	Uncharacterized	https://www.encodeproject.org/files/ENCFF648HFC/@@download/ENCFF648HFC.bed.gz	TF	Yes		RNA binding protein,transcription factor	COG1142
CTCF		Non-preferred	https://www.encodeproject.org/files/ENCFF611FHI/@@download/ENCFF611FHI.bed.gz	TF	Yes		RNA binding protein,transcription factor	COG1142
CTCF		Preferred	https://www.encodeproject.org/files/ENCFF123DAC/@@download/ENCFF123DAC.bed.gz	TF	Yes		RNA binding protein,transcription factor	COG1142
CTCF		Non-preferred	https://www.encodeproject.org/files/ENCFF695QSJ/@@download/ENCFF695QSJ.bed.gz	TF	Yes		RNA binding protein,transcription factor	COG1142
CTCF		Non-preferred	https://www.encodeproject.org/files/ENCFF704ECS/@@download/ENCFF704ECS.bed.gz	TF	Yes		RNA binding protein,transcription factor	COG1142
DBP	FLAG	Preferred	https://www.encodeproject.org/files/ENCFF945MVC/@@download/ENCFF945MVC.bed.gz	TF	Yes		transcription factor	COG1196
DDIT3	FLAG	Preferred	https://www.encodeproject.org/files/ENCFF845NWV/@@download/ENCFF845NWV.bed.gz	TF	Yes		transcription factor	COG2433
DLX6	FLAG	Preferred	https://www.encodeproject.org/files/ENCFF460TXX/@@download/ENCFF460TXX.bed.gz	TF	Yes		transcription factor	COG1403
DMAP1	FLAG	Preferred	https://www.encodeproject.org/files/ENCFF423IFD/@@download/ENCFF423IFD.bed.gz	Other	No		transcription factor	COG1403
DMTF1	FLAG	Preferred	https://www.encodeproject.org/files/ENCFF886PNQ/@@download/ENCFF886PNQ.bed.gz	TF	Yes		transcription factor	COG1595
DNMT1	FLAG	Preferred	https://www.encodeproject.org/files/ENCFF350FND/@@download/ENCFF350FND.bed.gz	TF	Yes		RNA binding protein,transcription factor	COG0425
DNMT3B	FLAG	Preferred	https://www.encodeproject.org/files/ENCFF469JVY/@@download/ENCFF469JVY.bed.gz	Other	No		transcription factor	COG0270
DPF1	FLAG	Preferred	https://www.ncbi.nlm.nih.gov/geo/download/?acc=GSM7503109&format=file&file=GSM7503109%5FDPF1%2DFLAG%5FPreferred%5FLocal%2EnarrowPeak%2Egz	TF	Yes		transcription factor	COG0436
DPF2	FLAG	Preferred	https://www.encodeproject.org/files/ENCFF599FAQ/@@download/ENCFF599FAQ.bed.gz	Other	No		transcription factor	COG1403
DR1	FLAG	Preferred	https://www.encodeproject.org/files/ENCFF043PLX/@@download/ENCFF043PLX.bed.gz	TF	Yes		transcription factor	COG1196
DRAP1	FLAG	Preferred	https://www.encodeproject.org/files/ENCFF596EYH/@@download/ENCFF596EYH.bed.gz	TF	Yes		transcription factor	COG1403
DZIP1	FLAG	Preferred	https://www.encodeproject.org/files/ENCFF718UWQ/@@download/ENCFF718UWQ.bed.gz	TF	Yes		transcription factor	COG1403
E2F1	FLAG	Preferred	https://www.encodeproject.org/files/ENCFF509VPA/@@download/ENCFF509VPA.bed.gz	TF	Yes		transcription factor	COG3170
E2F2	FLAG	Preferred	https://www.encodeproject.org/files/ENCFF987IVP/@@download/ENCFF987IVP.bed.gz	TF	Yes		transcription factor	COG3170
E2F4	FLAG	Preferred	https://www.encodeproject.org/files/ENCFF519KUR/@@download/ENCFF519KUR.bed.gz	TF	Yes		transcription factor	COG3170
E2F5	FLAG	Preferred	https://www.encodeproject.org/files/ENCFF732NHA/@@download/ENCFF732NHA.bed.gz	TF	Yes		transcription factor	COG3170
E2F7	FLAG	Preferred	https://www.ncbi.nlm.nih.gov/geo/download/?acc=GSM7503110&format=file&file=GSM7503110%5FE2F7%2DFLAG%5FPreferred%5FLocal%2EnarrowPeak%2Egz	TF	Yes		transcription factor	COG1414
E2F8	FLAG	Preferred	https://www.ncbi.nlm.nih.gov/geo/download/?acc=GSM7503111&format=file&file=GSM7503111%5FE2F8%2DFLAG%5FPreferred%5FLocal%2EnarrowPeak%2Egz	TF	Yes		transcription factor	COG2865
E4F1	FLAG	Preferred	https://www.ncbi.nlm.nih.gov/geo/download/?acc=GSM7503112&format=file&file=GSM7503112%5FE4F1%2DFLAG%5FPreferred%5FLocal%2EnarrowPeak%2Egz	TF	Yes		transcription factor	COG0295
EBF1	FLAG	Preferred	https://www.ncbi.nlm.nih.gov/geo/download/?acc=GSM7503113&format=file&file=GSM7503113%5FEBF1%2DFLAG%5FPreferred%5FLocal%2EnarrowPeak%2Egz	TF	Yes		transcription factor	COG0823
EEA1	FLAG	Preferred	https://www.encodeproject.org/files/ENCFF996HVG/@@download/ENCFF996HVG.bed.gz	TF	Yes		transcription factor	COG1196
EED	FLAG	Preferred	https://www.encodeproject.org/files/ENCFF481KFX/@@download/ENCFF481KFX.bed.gz	Other	No		transcription factor	COG2319
EGR1	FLAG	Preferred	https://www.encodeproject.org/files/ENCFF769NZQ/@@download/ENCFF769NZQ.bed.gz	TF	Yes		transcription factor	COG3409
EHMT2		Preferred	https://www.encodeproject.org/files/ENCFF289HHW/@@download/ENCFF289HHW.bed.gz	Other			transcription factor,chromatin remodeller	COG0666
ELF1		Non-preferred	https://www.encodeproject.org/files/ENCFF374YEM/@@download/ENCFF374YEM.bed.gz	TF	Yes		transcription factor	COG0488
ELF1	FLAG	Preferred	https://www.encodeproject.org/files/ENCFF561HAC/@@download/ENCFF561HAC.bed.gz	TF	Yes		transcription factor	COG0488
ELF3	FLAG	Preferred	https://www.encodeproject.org/files/ENCFF358NYG/@@download/ENCFF358NYG.bed.gz	TF	Yes		transcription factor	COG1357
ELF4	FLAG	Preferred	https://www.encodeproject.org/files/ENCFF739XKR/@@download/ENCFF739XKR.bed.gz	TF	Yes		transcription factor	COG5492
ELK1	FLAG	Preferred	https://www.encodeproject.org/files/ENCFF079BRO/@@download/ENCFF079BRO.bed.gz	TF	Yes		transcription factor	COG3266
ELK3	FLAG	Preferred	https://www.ncbi.nlm.nih.gov/geo/download/?acc=GSM7503114&format=file&file=GSM7503114%5FELK3%2DFLAG%5FPreferred%5FLocal%2EnarrowPeak%2Egz	TF	Yes		transcription factor	COG3170
ELK4	FLAG	Preferred	https://www.ncbi.nlm.nih.gov/geo/download/?acc=GSM7503115&format=file&file=GSM7503115%5FELK4%2DFLAG%5FPreferred%5FLocal%2EnarrowPeak%2Egz	TF	Yes		transcription factor	COG3266
EP300	FLAG	Non-preferred	https://www.ncbi.nlm.nih.gov/geo/download/?acc=GSM7503116&format=file&file=GSM7503116%5FEP300%2DFLAG%5FNon%2Dpreferred%5FLocal%2EnarrowPeak%2Egz	Other	No		transcription factor	COG1054
EP300		Preferred	https://www.encodeproject.org/files/ENCFF726NGV/@@download/ENCFF726NGV.bed.gz	Other	No		transcription factor	COG1054
EP300	FLAG	Uncharacterized	https://www.encodeproject.org/files/ENCFF702VBV/@@download/ENCFF702VBV.bed.gz	Other	No		transcription factor	COG1054
EP300		Non-preferred	https://www.encodeproject.org/files/ENCFF307PSW/@@download/ENCFF307PSW.bed.gz	Other	No		transcription factor	COG1054
ERF	FLAG	Preferred	https://www.encodeproject.org/files/ENCFF487FCZ/@@download/ENCFF487FCZ.bed.gz	TF	Yes		transcription factor	COG2124
ESRRA	FLAG	Preferred	https://www.encodeproject.org/files/ENCFF022ALT/@@download/ENCFF022ALT.bed.gz	TF	Yes		transcription factor	COG1573
ETS1		Non-preferred	https://www.encodeproject.org/files/ENCFF802CAB/@@download/ENCFF802CAB.bed.gz	TF	Yes		transcription factor	COG1309
ETS1	FLAG	Preferred	https://www.encodeproject.org/files/ENCFF574HYI/@@download/ENCFF574HYI.bed.gz	TF	Yes		transcription factor	COG1309
ETV4		Preferred	https://www.encodeproject.org/files/ENCFF231DZR/@@download/ENCFF231DZR.bed.gz	TF	Yes		transcription factor	COG3662
ETV5	FLAG	Preferred	https://www.encodeproject.org/files/ENCFF072RWQ/@@download/ENCFF072RWQ.bed.gz	TF	Yes		transcription factor	COG4695
ETV6	FLAG	Preferred	https://www.encodeproject.org/files/ENCFF387KML/@@download/ENCFF387KML.bed.gz	TF	Yes		transcription factor	COG0286
EZH2		Preferred	https://www.encodeproject.org/files/ENCFF521AKL/@@download/ENCFF521AKL.bed.gz	Other	No		transcription factor,chromatin remodeller,RNA binding protein	COG1403
FAM200B	FLAG	Preferred	https://www.ncbi.nlm.nih.gov/geo/download/?acc=GSM7503117&format=file&file=GSM7503117%5FFAM200B%2DFLAG%5FPreferred%5FLocal%2EnarrowPeak%2Egz	TF	Yes			COG2826
FIP1L1		Preferred	https://www.encodeproject.org/files/ENCFF761RXC/@@download/ENCFF761RXC.bed.gz	Other		mRNA processing protein, RNA-binding protein. No clear DNA binding domain.	RNA binding protein,transcription factor	COG5511
FOSL1	FLAG	Preferred	https://www.ncbi.nlm.nih.gov/geo/download/?acc=GSM7503118&format=file&file=GSM7503118%5FFOSL1%2DFLAG%5FPreferred%5FLocal%2EnarrowPeak%2Egz	TF	Yes		transcription factor	COG4372
FOSL2		Non-preferred	https://www.encodeproject.org/files/ENCFF916GIW/@@download/ENCFF916GIW.bed.gz	TF	Yes		transcription factor	COG2138
FOSL2	FLAG	Preferred	https://www.encodeproject.org/files/ENCFF200ULH/@@download/ENCFF200ULH.bed.gz	TF	Yes		transcription factor	COG2138
FOXA1		Non-preferred	https://www.encodeproject.org/files/ENCFF055VNJ/@@download/ENCFF055VNJ.bed.gz	TF	Yes		transcription factor	COG0741
FOXA1		Non-preferred	https://www.encodeproject.org/files/ENCFF356THI/@@download/ENCFF356THI.bed.gz	TF	Yes		transcription factor	COG0741
FOXA1	FLAG	Uncharacterized	https://www.encodeproject.org/files/ENCFF235PEX/@@download/ENCFF235PEX.bed.gz	TF	Yes		transcription factor	COG0741
FOXA1		Preferred	https://www.encodeproject.org/files/ENCFF250ISH/@@download/ENCFF250ISH.bed.gz	TF	Yes		transcription factor	COG0741
FOXA2	FLAG	Non-preferred	https://www.encodeproject.org/files/ENCFF296CWC/@@download/ENCFF296CWC.bed.gz	TF	Yes		transcription factor	COG5651
FOXA2		Preferred	https://www.encodeproject.org/files/ENCFF589WTM/@@download/ENCFF589WTM.bed.gz	TF	Yes		transcription factor	COG5651
FOXA3	FLAG	Preferred	https://www.encodeproject.org/files/ENCFF966LKN/@@download/ENCFF966LKN.bed.gz	TF	Yes		transcription factor	COG1280
FOXC1	FLAG	Preferred	https://www.ncbi.nlm.nih.gov/geo/download/?acc=GSM7503119&format=file&file=GSM7503119%5FFOXC1%2DFLAG%5FPreferred%5FLocal%2EnarrowPeak%2Egz	TF	Yes		transcription factor	COG0741
FOXJ3	FLAG	Preferred	https://www.encodeproject.org/files/ENCFF091YXG/@@download/ENCFF091YXG.bed.gz	TF	Yes		transcription factor	COG0639
FOXK1	FLAG	Preferred	https://www.encodeproject.org/files/ENCFF791TBH/@@download/ENCFF791TBH.bed.gz	TF	Yes		transcription factor	COG3266
FOXK2		Preferred	https://www.encodeproject.org/files/ENCFF008HBF/@@download/ENCFF008HBF.bed.gz	TF	Yes		transcription factor	COG3087
FOXM1	FLAG	Preferred	https://www.encodeproject.org/files/ENCFF488UEC/@@download/ENCFF488UEC.bed.gz	TF	Yes		transcription factor	COG3266
FOXO1	FLAG	Preferred	https://www.encodeproject.org/files/ENCFF068YNL/@@download/ENCFF068YNL.bed.gz	TF	Yes		transcription factor	COG3209
FOXO4	FLAG	Preferred	https://www.ncbi.nlm.nih.gov/geo/download/?acc=GSM7503120&format=file&file=GSM7503120%5FFOXO4%2DFLAG%5FPreferred%5FLocal%2EnarrowPeak%2Egz	TF	Yes		transcription factor	COG3515
FOXP1		Non-preferred	https://www.encodeproject.org/files/ENCFF333EZN/@@download/ENCFF333EZN.bed.gz	TF	Yes		transcription factor	COG0582
FOXP1	FLAG	Preferred	https://www.encodeproject.org/files/ENCFF786ATC/@@download/ENCFF786ATC.bed.gz	TF	Yes		transcription factor	COG0582
FOXP4	FLAG	Preferred	https://www.encodeproject.org/files/ENCFF334AQD/@@download/ENCFF334AQD.bed.gz	TF	Yes		transcription factor	COG3599
FUBP1	FLAG	Preferred	https://www.encodeproject.org/files/ENCFF742ZEJ/@@download/ENCFF742ZEJ.bed.gz	Other	No		RNA binding protein,transcription factor	COG4403
FUBP3	FLAG	Preferred	https://www.encodeproject.org/files/ENCFF760OHO/@@download/ENCFF760OHO.bed.gz	Other	No		RNA binding protein,transcription factor	COG3409
FUS		Preferred	https://www.encodeproject.org/files/ENCFF682NJA/@@download/ENCFF682NJA.bed.gz	Other	No		RNA binding protein,transcription factor	COG3409
GABPA		Non-preferred	https://www.encodeproject.org/files/ENCFF528DHC/@@download/ENCFF528DHC.bed.gz	TF	Yes		transcription factor	COG1475
GABPA	FLAG	Preferred	https://www.encodeproject.org/files/ENCFF776HYP/@@download/ENCFF776HYP.bed.gz	TF	Yes		transcription factor	COG1475
GABPB1	FLAG	Preferred	https://www.encodeproject.org/files/ENCFF596YTW/@@download/ENCFF596YTW.bed.gz	Other	No		transcription factor	COG0666
GATA2	FLAG	Preferred	https://www.encodeproject.org/files/ENCFF997DRI/@@download/ENCFF997DRI.bed.gz	TF	Yes		transcription factor	COG3064
GATA4		Preferred	https://www.encodeproject.org/files/ENCFF139ESP/@@download/ENCFF139ESP.bed.gz	TF	Yes		transcription factor	COG0791
GATAD1	FLAG	Preferred	https://www.encodeproject.org/files/ENCFF903ULA/@@download/ENCFF903ULA.bed.gz	Other	No		transcription factor	COG0507
GATAD2A	FLAG	Preferred	https://www.encodeproject.org/files/ENCFF211HPQ/@@download/ENCFF211HPQ.bed.gz	TF	Yes		transcription factor	COG3468
GFI1	FLAG	Preferred	https://www.encodeproject.org/files/ENCFF821FDT/@@download/ENCFF821FDT.bed.gz	TF	Yes		transcription factor	COG3209
GLI4	FLAG	Preferred	https://www.encodeproject.org/files/ENCFF707KQF/@@download/ENCFF707KQF.bed.gz	TF	Yes		transcription factor	COG1917
GLMP	FLAG	Preferred	https://www.ncbi.nlm.nih.gov/geo/download/?acc=GSM7503121&format=file&file=GSM7503121%5FGLMP%2DFLAG%5FPreferred%5FLocal%2EnarrowPeak%2Egz	TF	Yes			COG2814
GLYR1	FLAG	Preferred	https://www.ncbi.nlm.nih.gov/geo/download/?acc=GSM7503122&format=file&file=GSM7503122%5FGLYR1%2DFLAG%5FPreferred%5FLocal%2EnarrowPeak%2Egz	TF	Yes		transcription factor	COG2084
GMEB1	FLAG	Preferred	https://www.encodeproject.org/files/ENCFF665DFU/@@download/ENCFF665DFU.bed.gz	TF	Yes		transcription factor	COG3170
GMEB2	FLAG	Preferred	https://www.encodeproject.org/files/ENCFF169LKJ/@@download/ENCFF169LKJ.bed.gz	TF	Yes		transcription factor	COG3266
GPBP1L1	FLAG	Non-preferred	https://www.ncbi.nlm.nih.gov/geo/download/?acc=GSM7503123&format=file&file=GSM7503123%5FGPBP1L1%2DFLAG%5FNon%2Dpreferred%5FLocal%2EnarrowPeak%2Egz	TF	Yes			COG3023
GPBP1L1	FLAG	Preferred	https://www.encodeproject.org/files/ENCFF111TVQ/@@download/ENCFF111TVQ.bed.gz	TF	Yes			COG3023
GPN1	FLAG	Preferred	https://www.encodeproject.org/files/ENCFF926PNY/@@download/ENCFF926PNY.bed.gz	Other		Appears to be involved in RNAP import, assembly, and possibly scaffolding with other proteins. GTPase, but not DNA-binding, it seems.		COG2304
GTF2F1		Preferred	https://www.encodeproject.org/files/ENCFF171VVS/@@download/ENCFF171VVS.bed.gz	Other	No		RNA binding protein,transcription factor	COG4372
GTF2F1		Non-preferred	https://www.encodeproject.org/files/ENCFF192JMF/@@download/ENCFF192JMF.bed.gz	Other	No		RNA binding protein,transcription factor	COG4372
GTF3A	FLAG	Preferred	https://www.encodeproject.org/files/ENCFF413CKX/@@download/ENCFF413CKX.bed.gz	TF	Yes		transcription factor	COG0675
GZF1	FLAG	Preferred	https://www.encodeproject.org/files/ENCFF338SBU/@@download/ENCFF338SBU.bed.gz	TF	Yes		transcription factor	COG0358
H3K27ac		Preferred	https://www.encodeproject.org/files/ENCFF012ADZ/@@download/ENCFF012ADZ.bed.gz	Histone Mark			histone,narrow histone mark
H3K27me3		Preferred	https://www.encodeproject.org/files/ENCFF080RXC/@@download/ENCFF080RXC.bed.gz	Histone Mark			histone,broad histone mark
H3K36me3		Preferred	https://www.encodeproject.org/files/ENCFF829XFT/@@download/ENCFF829XFT.bed.gz	Histone Mark			histone,broad histone mark
H3K4me1		Preferred	https://www.encodeproject.org/files/ENCFF424GUI/@@download/ENCFF424GUI.bed.gz	Histone Mark			histone,broad histone mark
H3K4me2		Preferred	https://www.encodeproject.org/files/ENCFF800GTZ/@@download/ENCFF800GTZ.bed.gz	Histone Mark			histone,narrow histone mark
H3K4me3		Non-preferred	https://www.encodeproject.org/files/ENCFF549DKP/@@download/ENCFF549DKP.bed.gz	Histone Mark			histone,narrow histone mark
H3K4me3		Non-preferred	https://www.encodeproject.org/files/ENCFF040IFA/@@download/ENCFF040IFA.bed.gz	Histone Mark			histone,narrow histone mark
H3K4me3		Preferred	https://www.encodeproject.org/files/ENCFF276NZQ/@@download/ENCFF276NZQ.bed.gz	Histone Mark			histone,narrow histone mark
H3K9ac		Preferred	https://www.encodeproject.org/files/ENCFF219XNL/@@download/ENCFF219XNL.bed.gz	Histone Mark			histone,narrow histone mark
H3K9me3		Preferred	https://www.encodeproject.org/files/ENCFF745LNA/@@download/ENCFF745LNA.bed.gz	Histone Mark			histone,broad histone mark
H4K20me1		Preferred	https://www.encodeproject.org/files/ENCFF942YUJ/@@download/ENCFF942YUJ.bed.gz	Histone Mark			histone,broad histone mark
HBP1	FLAG	Preferred	https://www.encodeproject.org/files/ENCFF113RAY/@@download/ENCFF113RAY.bed.gz	TF	Yes		RNA binding protein,transcription factor	COG2133
HCFC1		Preferred	https://www.encodeproject.org/files/ENCFF391KIU/@@download/ENCFF391KIU.bed.gz	Other	No		transcription factor	COG4733
HDAC1	FLAG	Non-preferred	https://www.encodeproject.org/files/ENCFF339XCW/@@download/ENCFF339XCW.bed.gz	Other	No		transcription factor,chromatin remodeller,RNA binding protein	COG0123
HDAC1		Preferred	https://www.encodeproject.org/files/ENCFF720MUU/@@download/ENCFF720MUU.bed.gz	Other	No		transcription factor,chromatin remodeller,RNA binding protein	COG0123
HDAC2		Non-preferred	https://www.encodeproject.org/files/ENCFF491JNC/@@download/ENCFF491JNC.bed.gz	Other	No		transcription factor,chromatin remodeller	COG0123
HDAC2	FLAG	Uncharacterized	https://www.encodeproject.org/files/ENCFF912MTN/@@download/ENCFF912MTN.bed.gz	Other	No		transcription factor,chromatin remodeller	COG0123
HDAC2		Preferred	https://www.encodeproject.org/files/ENCFF068DVP/@@download/ENCFF068DVP.bed.gz	Other	No		transcription factor,chromatin remodeller	COG0123
HDAC6		Preferred	https://www.encodeproject.org/files/ENCFF358RPJ/@@download/ENCFF358RPJ.bed.gz	Other	No		transcription factor,chromatin remodeller	COG0494
HES4	FLAG	Preferred	https://www.ncbi.nlm.nih.gov/geo/download/?acc=GSM7503124&format=file&file=GSM7503124%5FHES4%2DFLAG%5FPreferred%5FLocal%2EnarrowPeak%2Egz	TF	Yes		transcription factor	COG3599
HES6	FLAG	Preferred	https://www.ncbi.nlm.nih.gov/geo/download/?acc=GSM7503125&format=file&file=GSM7503125%5FHES6%2DFLAG%5FPreferred%5FLocal%2EnarrowPeak%2Egz	TF	Yes		transcription factor	COG5607
HHEX	FLAG	Preferred	https://www.encodeproject.org/files/ENCFF287QGX/@@download/ENCFF287QGX.bed.gz	TF	Yes		transcription factor	COG2963
HIC2	FLAG	Preferred	https://www.ncbi.nlm.nih.gov/geo/download/?acc=GSM7503126&format=file&file=GSM7503126%5FHIC2%2DFLAG%5FPreferred%5FLocal%2EnarrowPeak%2Egz	TF	Yes		transcription factor	COG3409
HINFP	FLAG	Preferred	https://www.encodeproject.org/files/ENCFF718SEF/@@download/ENCFF718SEF.bed.gz	TF	Yes		transcription factor	COG1403
HIVEP1	FLAG	Preferred	https://www.encodeproject.org/files/ENCFF215ESU/@@download/ENCFF215ESU.bed.gz	TF	Yes		transcription factor	COG1961
ZNF875	FLAG	Preferred	https://www.ncbi.nlm.nih.gov/geo/download/?acc=GSM7503127&format=file&file=GSM7503127%5FHKR1%2DFLAG%5FPreferred%5FLocal%2EnarrowPeak%2Egz	TF	Yes		transcription factor
HLF	FLAG	Preferred	https://www.encodeproject.org/files/ENCFF389WFG/@@download/ENCFF389WFG.bed.gz	TF	Yes		transcription factor	COG4372
HMG20A	FLAG	Preferred	https://www.encodeproject.org/files/ENCFF245ELB/@@download/ENCFF245ELB.bed.gz	TF	Yes		transcription factor	COG1403
HMG20B	FLAG	Preferred	https://www.encodeproject.org/files/ENCFF517FAL/@@download/ENCFF517FAL.bed.gz	TF	Yes		transcription factor	COG1961
HMGA1	FLAG	Preferred	https://www.encodeproject.org/files/ENCFF490TYP/@@download/ENCFF490TYP.bed.gz	TF	Yes		transcription factor	COG3237
HMGN3	FLAG	Preferred	https://www.ncbi.nlm.nih.gov/geo/download/?acc=GSM7503128&format=file&file=GSM7503128%5FHMGN3%2DFLAG%5FPreferred%5FLocal%2EnarrowPeak%2Egz	TF	Yes		transcription factor	COG3729
HMGXB3	FLAG	Preferred	https://www.encodeproject.org/files/ENCFF463ZVL/@@download/ENCFF463ZVL.bed.gz	Other	No		transcription factor	COG0128
HMGXB4	FLAG	Non-preferred	https://www.encodeproject.org/files/ENCFF213JWA/@@download/ENCFF213JWA.bed.gz	Other	No		transcription factor	COG3064
HMGXB4	FLAG	Preferred	https://www.encodeproject.org/files/ENCFF465GLH/@@download/ENCFF465GLH.bed.gz	Other	No		transcription factor	COG3064
HNF1A	FLAG	Non-preferred	https://www.encodeproject.org/files/ENCFF240DSS/@@download/ENCFF240DSS.bed.gz	TF	Yes		transcription factor	COG5511
HNF1A		Preferred	https://www.encodeproject.org/files/ENCFF346SLA/@@download/ENCFF346SLA.bed.gz	TF	Yes		transcription factor	COG5511
HNF1B	FLAG	Preferred	https://www.encodeproject.org/files/ENCFF890HTY/@@download/ENCFF890HTY.bed.gz	TF	Yes		transcription factor	COG2027
HNF4A	FLAG	Preferred	https://www.encodeproject.org/files/ENCFF711YEK/@@download/ENCFF711YEK.bed.gz	TF	Yes		transcription factor	COG1403
HNF4A		Non-preferred	https://www.encodeproject.org/files/ENCFF808SYK/@@download/ENCFF808SYK.bed.gz	TF	Yes		transcription factor	COG1403
HNF4G		Non-preferred	https://www.encodeproject.org/files/ENCFF492RBE/@@download/ENCFF492RBE.bed.gz	TF	Yes		transcription factor	COG1403
HNF4G	FLAG	Preferred	https://www.encodeproject.org/files/ENCFF107CTN/@@download/ENCFF107CTN.bed.gz	TF	Yes		transcription factor	COG1403
HNRNPH1		Preferred	https://www.encodeproject.org/files/ENCFF055HMB/@@download/ENCFF055HMB.bed.gz	Other		Part of the hnRNP complex which processes and splices mRNA. Has RNA motif recognition domains, but no apparent DNA binding domains.	RNA binding protein,transcription factor	COG3209
HNRNPK		Preferred	https://www.encodeproject.org/files/ENCFF542LXI/@@download/ENCFF542LXI.bed.gz	Other	No		RNA binding protein,transcription factor	COG3409
HNRNPL		Preferred	https://www.encodeproject.org/files/ENCFF163UML/@@download/ENCFF163UML.bed.gz	Other	No		RNA binding protein,transcription factor	COG4886
HNRNPLL		Preferred	https://www.encodeproject.org/files/ENCFF886DRH/@@download/ENCFF886DRH.bed.gz	Other		Regulates alternative splicing. Has RNA recognition motifs, but no apparent DNA binding domains.	RNA binding protein,transcription factor	COG4886
HNRNPUL1		Preferred	https://www.encodeproject.org/files/ENCFF323QVV/@@download/ENCFF323QVV.bed.gz	Other		RNA-binding member of hnRNP family. Interpro says the SAP domain is essential for specific DNA binding activity... and COULD BE a DNA-binding motif... Looks like the B30.2/SPRY domain may be involved with protein-protein interactions, of which this gene has many. PMC1422157. Some evidence that it works with BRD7 to repress transcription... IDK... I'm leaning towards Other.	RNA binding protein,transcription factor	COG0507
HOMEZ	FLAG	Preferred	https://www.encodeproject.org/files/ENCFF866VHP/@@download/ENCFF866VHP.bed.gz	TF	Yes		transcription factor	COG3064
HOXA3	FLAG	Preferred	https://www.encodeproject.org/files/ENCFF221IVJ/@@download/ENCFF221IVJ.bed.gz	TF	Yes		transcription factor	COG3064
HOXA5	FLAG	Preferred	https://www.encodeproject.org/files/ENCFF097HFR/@@download/ENCFF097HFR.bed.gz	TF	Yes		transcription factor	COG3409
HOXD1	FLAG	Preferred	https://www.encodeproject.org/files/ENCFF042QIU/@@download/ENCFF042QIU.bed.gz	TF	Yes		transcription factor	COG3064
HSF2	FLAG	Preferred	https://www.encodeproject.org/files/ENCFF932DAC/@@download/ENCFF932DAC.bed.gz	TF	Yes		transcription factor	COG4636
HSF4	FLAG	Preferred	https://www.ncbi.nlm.nih.gov/geo/download/?acc=GSM7503129&format=file&file=GSM7503129%5FHSF4%2DFLAG%5FPreferred%5FLocal%2EnarrowPeak%2Egz	TF	Yes		transcription factor	COG2801
IKZF1		Preferred	https://www.encodeproject.org/files/ENCFF632RQY/@@download/ENCFF632RQY.bed.gz	TF	Yes		transcription factor	COG2755
IKZF4	FLAG	Preferred	https://www.encodeproject.org/files/ENCFF547PTN/@@download/ENCFF547PTN.bed.gz	TF	Yes		transcription factor	COG1403
IKZF5	FLAG	Preferred	https://www.encodeproject.org/files/ENCFF973SAV/@@download/ENCFF973SAV.bed.gz	TF	Yes		transcription factor	COG0641
IRF1	FLAG	Preferred	https://www.encodeproject.org/files/ENCFF174QAR/@@download/ENCFF174QAR.bed.gz	TF	Yes		transcription factor	COG2801
IRF2	FLAG	Preferred	https://www.encodeproject.org/files/ENCFF856FVD/@@download/ENCFF856FVD.bed.gz	TF	Yes		transcription factor	COG0629
IRF3		Preferred	https://www.encodeproject.org/files/ENCFF284LUI/@@download/ENCFF284LUI.bed.gz	TF	Yes		transcription factor	COG2010
IRF5	FLAG	Preferred	https://www.encodeproject.org/files/ENCFF649YZW/@@download/ENCFF649YZW.bed.gz	TF	Yes		transcription factor	COG1972
ISL2	FLAG	Preferred	https://www.encodeproject.org/files/ENCFF608QXN/@@download/ENCFF608QXN.bed.gz	TF	Yes		transcription factor	COG0551
ISX	FLAG	Preferred	https://www.encodeproject.org/files/ENCFF872DSQ/@@download/ENCFF872DSQ.bed.gz	TF	Yes		transcription factor	COG2761
JRK	FLAG	Preferred	https://www.ncbi.nlm.nih.gov/geo/download/?acc=GSM7503130&format=file&file=GSM7503130%5FJRK%2DFLAG%5FPreferred%5FLocal%2EnarrowPeak%2Egz	TF	Yes			COG0582
JUN	FLAG	Preferred	https://www.encodeproject.org/files/ENCFF355KJO/@@download/ENCFF355KJO.bed.gz	TF	Yes		transcription factor	COG1196
JUN		Non-preferred	https://www.encodeproject.org/files/ENCFF265UCB/@@download/ENCFF265UCB.bed.gz	TF	Yes		transcription factor	COG1196
JUND		Non-preferred	https://www.encodeproject.org/files/ENCFF577XUM/@@download/ENCFF577XUM.bed.gz	TF	Yes		transcription factor	COG1196
JUND		Preferred	https://www.encodeproject.org/files/ENCFF281KZH/@@download/ENCFF281KZH.bed.gz	TF	Yes		transcription factor	COG1196
KAT2B		Preferred	https://www.encodeproject.org/files/ENCFF461YLX/@@download/ENCFF461YLX.bed.gz	Other	No		transcription factor,chromatin remodeller,RNA binding protein	COG0456
KAT6A	FLAG	Preferred	https://www.ncbi.nlm.nih.gov/geo/download/?acc=GSM7503131&format=file&file=GSM7503131%5FKAT6A%2DFLAG%5FPreferred%5FLocal%2EnarrowPeak%2Egz	Other	No		transcription factor	COG1361
KAT7	FLAG	Preferred	https://www.encodeproject.org/files/ENCFF009BCS/@@download/ENCFF009BCS.bed.gz	Other	Yes*	Chromatin remodeller	transcription factor	COG4469
KAT8	FLAG	Preferred	https://www.encodeproject.org/files/ENCFF688NGY/@@download/ENCFF688NGY.bed.gz	Other	No		transcription factor	COG1716
KDM1A		Non-preferred	https://www.encodeproject.org/files/ENCFF617QAV/@@download/ENCFF617QAV.bed.gz	Other	No		transcription factor,chromatin remodeller,RNA binding protein	COG1231
KDM1A	FLAG	Preferred	https://www.encodeproject.org/files/ENCFF376CNT/@@download/ENCFF376CNT.bed.gz	Other	No		transcription factor,chromatin remodeller,RNA binding protein	COG1231
KDM2A	FLAG	Preferred	https://www.encodeproject.org/files/ENCFF649VKX/@@download/ENCFF649VKX.bed.gz	TF	Yes		transcription factor	COG3209
KDM3A	FLAG	Preferred	https://www.encodeproject.org/files/ENCFF151FQM/@@download/ENCFF151FQM.bed.gz	Other	No		transcription factor	COG1670
KDM4B	FLAG	Preferred	https://www.encodeproject.org/files/ENCFF865PLF/@@download/ENCFF865PLF.bed.gz	Other			transcription factor	COG0732
KDM5A		Preferred	https://www.encodeproject.org/files/ENCFF620WRP/@@download/ENCFF620WRP.bed.gz	Other	No		transcription factor,chromatin remodeller	COG0086
KDM5B	FLAG	Preferred	https://www.encodeproject.org/files/ENCFF511KOY/@@download/ENCFF511KOY.bed.gz	TF	Yes		transcription factor,chromatin remodeller	COG1198
KDM6A	FLAG	Preferred	https://www.encodeproject.org/files/ENCFF291RTF/@@download/ENCFF291RTF.bed.gz	Other			transcription factor,chromatin remodeller	COG0457
USF3	FLAG	Preferred	https://www.encodeproject.org/files/ENCFF168XTB/@@download/ENCFF168XTB.bed.gz	TF	Yes		transcription factor
KLF11	FLAG	Preferred	https://www.encodeproject.org/files/ENCFF137AWT/@@download/ENCFF137AWT.bed.gz	TF	Yes		transcription factor	COG1413
KLF12	FLAG	Preferred	https://www.encodeproject.org/files/ENCFF099TJA/@@download/ENCFF099TJA.bed.gz	TF	Yes		transcription factor	COG1403
KLF13	FLAG	Preferred	https://www.encodeproject.org/files/ENCFF171DFD/@@download/ENCFF171DFD.bed.gz	TF	Yes		transcription factor	COG1403
KLF15	FLAG	Preferred	https://www.ncbi.nlm.nih.gov/geo/download/?acc=GSM7503132&format=file&file=GSM7503132%5FKLF15%2DFLAG%5FPreferred%5FLocal%2EnarrowPeak%2Egz	TF	Yes		transcription factor	COG1403
KLF16	FLAG	Preferred	https://www.encodeproject.org/files/ENCFF742BYA/@@download/ENCFF742BYA.bed.gz	TF	Yes		transcription factor	COG1403
KLF6	FLAG	Preferred	https://www.encodeproject.org/files/ENCFF407YHS/@@download/ENCFF407YHS.bed.gz	TF	Yes		transcription factor	COG2207
KLF9	FLAG	Preferred	https://www.encodeproject.org/files/ENCFF995GJI/@@download/ENCFF995GJI.bed.gz	TF	Yes		transcription factor	COG1403
KMT2A	FLAG	Preferred	https://www.encodeproject.org/files/ENCFF960SAF/@@download/ENCFF960SAF.bed.gz	TF	Yes		transcription factor	COG3210
KMT2B	FLAG	Preferred	https://www.encodeproject.org/files/ENCFF036WCY/@@download/ENCFF036WCY.bed.gz	TF	Yes		transcription factor,chromatin remodeller	COG1205
L3MBTL4	FLAG	Preferred	https://www.ncbi.nlm.nih.gov/geo/download/?acc=GSM7503133&format=file&file=GSM7503133%5FL3MBTL4%2DFLAG%5FPreferred%5FLocal%2EnarrowPeak%2Egz	TF	Yes		transcription factor	COG0457
LBX2	FLAG	Preferred	https://www.encodeproject.org/files/ENCFF391NQU/@@download/ENCFF391NQU.bed.gz	TF	Yes		transcription factor	COG1961
LCOR	FLAG	Preferred	https://www.encodeproject.org/files/ENCFF381EWF/@@download/ENCFF381EWF.bed.gz	TF	Yes		transcription factor	COG2963
LCORL	FLAG	Preferred	https://www.encodeproject.org/files/ENCFF723QWP/@@download/ENCFF723QWP.bed.gz	TF	Yes		transcription factor	COG0582
LCORL		Non-preferred	https://www.encodeproject.org/files/ENCFF789IAH/@@download/ENCFF789IAH.bed.gz	TF	Yes		transcription factor	COG0582
LHX6	FLAG	Preferred	https://www.ncbi.nlm.nih.gov/geo/download/?acc=GSM7503134&format=file&file=GSM7503134%5FLHX6%2DFLAG%5FPreferred%5FLocal%2EnarrowPeak%2Egz	TF	Yes		transcription factor	COG3677
LIN54	FLAG	Preferred	https://www.encodeproject.org/files/ENCFF582HAZ/@@download/ENCFF582HAZ.bed.gz	TF	Yes		transcription factor	COG4886
LRRFIP1	FLAG	Preferred	https://www.encodeproject.org/files/ENCFF765MRZ/@@download/ENCFF765MRZ.bed.gz	Other	No		transcription factor	COG1196
MAF1	FLAG	Preferred	https://www.encodeproject.org/files/ENCFF201XPX/@@download/ENCFF201XPX.bed.gz	TF			transcription factor	COG3871
MAFF		Preferred	https://www.encodeproject.org/files/ENCFF643LNZ/@@download/ENCFF643LNZ.bed.gz	TF	Yes		transcription factor	COG2963
MAFG	FLAG	Preferred	https://www.encodeproject.org/files/ENCFF311PMU/@@download/ENCFF311PMU.bed.gz	TF	Yes		transcription factor	COG1196
MAFK		Preferred	https://www.encodeproject.org/files/ENCFF259ECH/@@download/ENCFF259ECH.bed.gz	TF	Yes		transcription factor	COG2963
MAFK		Non-preferred	https://www.encodeproject.org/files/ENCFF458PBB/@@download/ENCFF458PBB.bed.gz	TF	Yes		transcription factor	COG2963
MATR3	FLAG	Preferred	https://www.encodeproject.org/files/ENCFF559BWX/@@download/ENCFF559BWX.bed.gz	Other	No		RNA binding protein,transcription factor	COG0457
MAX		Uncharacterized	https://www.encodeproject.org/files/ENCFF800ZTT/@@download/ENCFF800ZTT.bed.gz	TF	Yes		transcription factor	COG3335
MAX	FLAG	Uncharacterized	https://www.encodeproject.org/files/ENCFF707KEM/@@download/ENCFF707KEM.bed.gz	TF	Yes		transcription factor	COG3335
MAX		Preferred	https://www.encodeproject.org/files/ENCFF532JII/@@download/ENCFF532JII.bed.gz	TF	Yes		transcription factor	COG3335
MAZ		Non-preferred	https://www.encodeproject.org/files/ENCFF978KZX/@@download/ENCFF978KZX.bed.gz	TF	Yes		RNA binding protein,transcription factor	COG1198
MAZ	FLAG	Preferred	https://www.encodeproject.org/files/ENCFF535NYU/@@download/ENCFF535NYU.bed.gz	TF	Yes		RNA binding protein,transcription factor	COG1198
MBD1	FLAG	Non-preferred	https://www.encodeproject.org/files/ENCFF930VNZ/@@download/ENCFF930VNZ.bed.gz	TF	Yes		transcription factor	COG1716
MBD1	FLAG	Preferred	https://www.encodeproject.org/files/ENCFF510QJE/@@download/ENCFF510QJE.bed.gz	TF	Yes		transcription factor	COG1716
MBD4		Preferred	https://www.encodeproject.org/files/ENCFF695SHZ/@@download/ENCFF695SHZ.bed.gz	TF	Yes		transcription factor	COG1403
MED1	FLAG	Preferred	https://www.encodeproject.org/files/ENCFF721ULY/@@download/ENCFF721ULY.bed.gz	Other	No		transcription factor	COG1020
MED12	FLAG	Preferred	https://www.ncbi.nlm.nih.gov/geo/download/?acc=GSM7503135&format=file&file=GSM7503135%5FMED12%2DFLAG%5FPreferred%5FLocal%2EnarrowPeak%2Egz	Other	No		transcription factor	COG1020
MED13	FLAG	Preferred	https://www.encodeproject.org/files/ENCFF733RMW/@@download/ENCFF733RMW.bed.gz	Other	No		transcription factor	COG5280
MED13L	FLAG	Preferred	https://www.ncbi.nlm.nih.gov/geo/download/?acc=GSM7503136&format=file&file=GSM7503136%5FMED13L%2DFLAG%5FPreferred%5FLocal%2EnarrowPeak%2Egz	Other	No			COG3210
MEF2A	FLAG	Preferred	https://www.encodeproject.org/files/ENCFF987BRO/@@download/ENCFF987BRO.bed.gz	TF	Yes		transcription factor	COG2801
MEF2D	FLAG	Preferred	https://www.encodeproject.org/files/ENCFF370PHM/@@download/ENCFF370PHM.bed.gz	TF	Yes		transcription factor	COG4104
MEIS1	FLAG	Preferred	https://www.ncbi.nlm.nih.gov/geo/download/?acc=GSM7503137&format=file&file=GSM7503137%5FMEIS1%2DFLAG%5FPreferred%5FLocal%2EnarrowPeak%2Egz	TF	Yes		transcription factor	COG1595
MEIS2	FLAG	Preferred	https://www.ncbi.nlm.nih.gov/geo/download/?acc=GSM7503138&format=file&file=GSM7503138%5FMEIS2%2DFLAG%5FPreferred%5FLocal%2EnarrowPeak%2Egz	TF	Yes		transcription factor	COG1960
MGA	FLAG	Preferred	https://www.ncbi.nlm.nih.gov/geo/download/?acc=GSM7503139&format=file&file=GSM7503139%5FMGA%2DFLAG%5FPreferred%5FLocal%2EnarrowPeak%2Egz	TF	Yes		transcription factor	COG3209
MIER2	FLAG	Preferred	https://www.encodeproject.org/files/ENCFF822MEL/@@download/ENCFF822MEL.bed.gz	Other	No		transcription factor	COG2124
MIER3	FLAG	Preferred	https://www.encodeproject.org/files/ENCFF284RUU/@@download/ENCFF284RUU.bed.gz	Other	No		transcription factor	COG3378
MIXL1	FLAG	Preferred	https://www.encodeproject.org/files/ENCFF808DFD/@@download/ENCFF808DFD.bed.gz	TF	Yes		transcription factor	COG1403
MLLT10	FLAG	Preferred	https://www.encodeproject.org/files/ENCFF183UEL/@@download/ENCFF183UEL.bed.gz	Other	No		transcription factor	COG3677
MLX	FLAG	Preferred	https://www.encodeproject.org/files/ENCFF048HPB/@@download/ENCFF048HPB.bed.gz	TF	Yes		transcription factor	COG1317
MLXIP	FLAG	Preferred	https://www.ncbi.nlm.nih.gov/geo/download/?acc=GSM7503140&format=file&file=GSM7503140%5FMLXIP%2DFLAG%5FPreferred%5FLocal%2EnarrowPeak%2Egz	TF	Yes		transcription factor	COG1196
MNT		Non-preferred	https://www.encodeproject.org/files/ENCFF649NPR/@@download/ENCFF649NPR.bed.gz	TF	Yes		transcription factor	COG1403
MNT		Preferred	https://www.encodeproject.org/files/ENCFF624ACI/@@download/ENCFF624ACI.bed.gz	TF	Yes		transcription factor	COG1403
MNX1	FLAG	Preferred	https://www.encodeproject.org/files/ENCFF288SNR/@@download/ENCFF288SNR.bed.gz	TF	Yes		transcription factor	COG2814
MTA1	FLAG	Preferred	https://www.encodeproject.org/files/ENCFF656AKR/@@download/ENCFF656AKR.bed.gz	Other	No		transcription factor	COG1388
MTA3	FLAG	Preferred	https://www.encodeproject.org/files/ENCFF827SNM/@@download/ENCFF827SNM.bed.gz	Other	No		transcription factor	COG3878
MTF1	FLAG	Preferred	https://www.encodeproject.org/files/ENCFF562QVL/@@download/ENCFF562QVL.bed.gz	TF	Yes		transcription factor	COG3170
MTF2	FLAG	Preferred	https://www.encodeproject.org/files/ENCFF482HXQ/@@download/ENCFF482HXQ.bed.gz	Other	Yes*	Chromatin remodeller	transcription factor	COG1716
MXD1	FLAG	Preferred	https://www.encodeproject.org/files/ENCFF828KFT/@@download/ENCFF828KFT.bed.gz	TF	Yes		transcription factor	COG0789
MXD3	FLAG	Preferred	https://www.encodeproject.org/files/ENCFF098WCH/@@download/ENCFF098WCH.bed.gz	TF	Yes		transcription factor	COG1196
MXD4	FLAG	Preferred	https://www.encodeproject.org/files/ENCFF063ZGE/@@download/ENCFF063ZGE.bed.gz	TF	Yes		transcription factor	COG1196
MXI1		Preferred	https://www.encodeproject.org/files/ENCFF298UBV/@@download/ENCFF298UBV.bed.gz	TF	Yes		transcription factor	COG4372
MYBL2		Non-preferred	https://www.encodeproject.org/files/ENCFF408FLG/@@download/ENCFF408FLG.bed.gz	TF	Yes		transcription factor	COG1595
MYBL2	FLAG	Preferred	https://www.encodeproject.org/files/ENCFF182JRE/@@download/ENCFF182JRE.bed.gz	TF	Yes		transcription factor	COG1595
MYC		Preferred	https://www.encodeproject.org/files/ENCFF800JFG/@@download/ENCFF800JFG.bed.gz	TF	Yes		transcription factor	COG0515
MYNN	FLAG	Preferred	https://www.encodeproject.org/files/ENCFF447QQH/@@download/ENCFF447QQH.bed.gz	TF	Yes		transcription factor	COG3058
MYRF	FLAG	Preferred	https://www.encodeproject.org/files/ENCFF648BIX/@@download/ENCFF648BIX.bed.gz	TF	Yes		transcription factor	COG2372
MZF1	FLAG	Preferred	https://www.ncbi.nlm.nih.gov/geo/download/?acc=GSM7503141&format=file&file=GSM7503141%5FMZF1%2DFLAG%5FPreferred%5FLocal%2EnarrowPeak%2Egz	TF	Yes		transcription factor	COG0515
NAIF1	FLAG	Preferred	https://www.encodeproject.org/files/ENCFF264GUG/@@download/ENCFF264GUG.bed.gz	TF	Yes		transcription factor	COG1196
NBN		Preferred	https://www.encodeproject.org/files/ENCFF052NNP/@@download/ENCFF052NNP.bed.gz	Other		Appears to be a cofactor in DNA repair, along with ATM. Other.	transcription factor	COG1716
NCOA1	FLAG	Preferred	https://www.ncbi.nlm.nih.gov/geo/download/?acc=GSM7503142&format=file&file=GSM7503142%5FNCOA1%2DFLAG%5FPreferred%5FLocal%2EnarrowPeak%2Egz	TF	Yes		transcription factor	COG4223
NCOA2	FLAG	Preferred	https://www.ncbi.nlm.nih.gov/geo/download/?acc=GSM7503143&format=file&file=GSM7503143%5FNCOA2%2DFLAG%5FPreferred%5FLocal%2EnarrowPeak%2Egz	TF	Yes		transcription factor	COG4886
NCOA5	FLAG	Preferred	https://www.encodeproject.org/files/ENCFF390SPG/@@download/ENCFF390SPG.bed.gz	Other	No		transcription factor	COG3064
NCOR1		Preferred	https://www.encodeproject.org/files/ENCFF337NOK/@@download/ENCFF337NOK.bed.gz	Other	No		transcription factor,chromatin remodeller	COG1196
NFAT5	FLAG	Preferred	https://www.encodeproject.org/files/ENCFF758KHO/@@download/ENCFF758KHO.bed.gz	TF	Yes		transcription factor	COG0484
NFATC3	FLAG	Preferred	https://www.encodeproject.org/files/ENCFF956GJO/@@download/ENCFF956GJO.bed.gz	TF	Yes		transcription factor	COG4886
NFE2	FLAG	Preferred	https://www.encodeproject.org/files/ENCFF626AMA/@@download/ENCFF626AMA.bed.gz	TF	Yes		transcription factor	COG2433
NFE2L1	FLAG	Preferred	https://www.encodeproject.org/files/ENCFF392LXN/@@download/ENCFF392LXN.bed.gz	TF	Yes		transcription factor	COG2814
NFE2L2		Preferred	https://www.encodeproject.org/files/ENCFF876OXC/@@download/ENCFF876OXC.bed.gz	TF	Yes		transcription factor	COG1670
NFIA	FLAG	Preferred	https://www.encodeproject.org/files/ENCFF247AAE/@@download/ENCFF247AAE.bed.gz	TF	Yes		transcription factor	COG2124
NFIB	FLAG	Preferred	https://www.ncbi.nlm.nih.gov/geo/download/?acc=GSM7503144&format=file&file=GSM7503144%5FNFIB%2DFLAG%5FPreferred%5FLocal%2EnarrowPeak%2Egz	TF	Yes		transcription factor	COG3266
NFIC		Preferred	https://www.encodeproject.org/files/ENCFF226RTJ/@@download/ENCFF226RTJ.bed.gz	TF	Yes		transcription factor	COG0438
NFIL3	FLAG	Preferred	https://www.encodeproject.org/files/ENCFF056WXQ/@@download/ENCFF056WXQ.bed.gz	TF	Yes		transcription factor	COG1196
NFKB2	FLAG	Preferred	https://www.encodeproject.org/files/ENCFF098AHH/@@download/ENCFF098AHH.bed.gz	TF	Yes		transcription factor	COG2814
NFKBIZ	FLAG	Preferred	https://www.encodeproject.org/files/ENCFF868IVM/@@download/ENCFF868IVM.bed.gz	Other	No		transcription factor	COG0477
NFRKB		Preferred	https://www.encodeproject.org/files/ENCFF252JYE/@@download/ENCFF252JYE.bed.gz	Other	No		transcription factor	COG2208
NFYA	FLAG	Preferred	https://www.encodeproject.org/files/ENCFF799WBQ/@@download/ENCFF799WBQ.bed.gz	TF	Yes		transcription factor	COG3210
NFYB	FLAG	Preferred	https://www.encodeproject.org/files/ENCFF250THA/@@download/ENCFF250THA.bed.gz	TF	Yes		transcription factor	COG4584
NFYC	FLAG	Preferred	https://www.encodeproject.org/files/ENCFF666PKI/@@download/ENCFF666PKI.bed.gz	TF	Yes		transcription factor	COG3170
NKX3-1	FLAG	Preferred	https://www.encodeproject.org/files/ENCFF838IXI/@@download/ENCFF838IXI.bed.gz	TF	Yes		transcription factor	COG2963
NONO		Non-preferred	https://www.encodeproject.org/files/ENCFF422IRH/@@download/ENCFF422IRH.bed.gz	Other	No		RNA binding protein,transcription factor	COG2801
NONO		Preferred	https://www.encodeproject.org/files/ENCFF847WTF/@@download/ENCFF847WTF.bed.gz	Other	No		RNA binding protein,transcription factor	COG2801
NPAS2	FLAG	Preferred	https://www.ncbi.nlm.nih.gov/geo/download/?acc=GSM7503145&format=file&file=GSM7503145%5FNPAS2%2DFLAG%5FPreferred%5FLocal%2EnarrowPeak%2Egz	TF	Yes		transcription factor	COG0631
NR0B2	FLAG	Preferred	https://www.encodeproject.org/files/ENCFF801BTX/@@download/ENCFF801BTX.bed.gz	Other	No		transcription factor	COG1357
NR1H2	FLAG	Preferred	https://www.ncbi.nlm.nih.gov/geo/download/?acc=GSM7503146&format=file&file=GSM7503146%5FNR1H2%2DFLAG%5FPreferred%5FLocal%2EnarrowPeak%2Egz	TF	Yes		transcription factor	COG2814
NR2C2		Non-preferred	https://www.encodeproject.org/files/ENCFF687EVI/@@download/ENCFF687EVI.bed.gz	TF	Yes		transcription factor	COG1028
NR2C2	FLAG	Preferred	https://www.encodeproject.org/files/ENCFF525KBT/@@download/ENCFF525KBT.bed.gz	TF	Yes		transcription factor	COG1028
NR2F1	FLAG	Preferred	https://www.encodeproject.org/files/ENCFF743WMC/@@download/ENCFF743WMC.bed.gz	TF	Yes		transcription factor	COG3464
NR2F1	eGFP	Non-preferred	https://www.encodeproject.org/files/ENCFF460HFX/@@download/ENCFF460HFX.bed.gz	TF	Yes		transcription factor	COG3464
NR2F2		Preferred	https://www.encodeproject.org/files/ENCFF681WXL/@@download/ENCFF681WXL.bed.gz	TF	Yes		transcription factor	COG0154
NR2F6		Non-preferred	https://www.encodeproject.org/files/ENCFF529UHN/@@download/ENCFF529UHN.bed.gz	TF	Yes		transcription factor	COG3677
NR2F6	FLAG	Preferred	https://www.encodeproject.org/files/ENCFF597EOO/@@download/ENCFF597EOO.bed.gz	TF	Yes		transcription factor	COG3677
NR3C1	FLAG	Preferred	https://www.encodeproject.org/files/ENCFF733MQF/@@download/ENCFF733MQF.bed.gz	TF	Yes		transcription factor	COG5492
NR5A1	FLAG	Preferred	https://www.encodeproject.org/files/ENCFF304HWM/@@download/ENCFF304HWM.bed.gz	TF	Yes		transcription factor	COG1545
NRF1		Non-preferred	https://www.encodeproject.org/files/ENCFF785BAI/@@download/ENCFF785BAI.bed.gz	TF	Yes		transcription factor	COG2226
NRF1		Preferred	https://www.encodeproject.org/files/ENCFF520WIR/@@download/ENCFF520WIR.bed.gz	TF	Yes		transcription factor	COG2226
NRL	FLAG	Preferred	https://www.encodeproject.org/files/ENCFF789ZJN/@@download/ENCFF789ZJN.bed.gz	TF	Yes		transcription factor	COG3599
ONECUT1	FLAG	Preferred	https://www.encodeproject.org/files/ENCFF759WME/@@download/ENCFF759WME.bed.gz	TF	Yes		transcription factor	COG3620
ONECUT2	FLAG	Preferred	https://www.encodeproject.org/files/ENCFF476NUG/@@download/ENCFF476NUG.bed.gz	TF	Yes		transcription factor	COG1403
PAF1	FLAG	Preferred	https://www.encodeproject.org/files/ENCFF404XCS/@@download/ENCFF404XCS.bed.gz	Other			transcription factor,chromatin remodeller	COG3378
PATZ1	FLAG	Preferred	https://www.encodeproject.org/files/ENCFF024AEZ/@@download/ENCFF024AEZ.bed.gz	TF	Yes		transcription factor	COG1961
PAWR	FLAG	Preferred	https://www.encodeproject.org/files/ENCFF610NSO/@@download/ENCFF610NSO.bed.gz	Other	No		transcription factor	COG1196
PAX8	FLAG	Preferred	https://www.ncbi.nlm.nih.gov/geo/download/?acc=GSM7503147&format=file&file=GSM7503147%5FPAX8%2DFLAG%5FPreferred%5FLocal%2EnarrowPeak%2Egz	TF	Yes		transcription factor	COG0515
PAXIP1	FLAG	Preferred	https://www.encodeproject.org/files/ENCFF825TUP/@@download/ENCFF825TUP.bed.gz	Other	No			COG0457
PBX2	FLAG	Preferred	https://www.encodeproject.org/files/ENCFF295AGS/@@download/ENCFF295AGS.bed.gz	TF	Yes		transcription factor	COG3409
PBX3	FLAG	Preferred	https://www.ncbi.nlm.nih.gov/geo/download/?acc=GSM7503148&format=file&file=GSM7503148%5FPBX3%2DFLAG%5FPreferred%5FLocal%2EnarrowPeak%2Egz	TF	Yes		transcription factor	COG1309
PCBP1		Preferred	https://www.encodeproject.org/files/ENCFF884TSX/@@download/ENCFF884TSX.bed.gz	Other	No		RNA binding protein,transcription factor	COG1196
PCBP2		Preferred	https://www.encodeproject.org/files/ENCFF057DYX/@@download/ENCFF057DYX.bed.gz	Other	No		RNA binding protein,transcription factor	COG4223
PEG3	FLAG	Preferred	https://www.ncbi.nlm.nih.gov/geo/download/?acc=GSM7503149&format=file&file=GSM7503149%5FPEG3%2DFLAG%5FPreferred%5FLocal%2EnarrowPeak%2Egz	TF	Yes		transcription factor	COG5263
PHB2		Preferred	https://www.encodeproject.org/files/ENCFF597SCY/@@download/ENCFF597SCY.bed.gz	Other	No		transcription factor	COG3209
PHF20	FLAG	Preferred	https://www.encodeproject.org/files/ENCFF176BYA/@@download/ENCFF176BYA.bed.gz	TF	Yes		transcription factor	COG0675
PHF21A	FLAG	Preferred	https://www.encodeproject.org/files/ENCFF421PRN/@@download/ENCFF421PRN.bed.gz	TF	Yes		transcription factor	COG1961
PHF8		Non-preferred	https://www.encodeproject.org/files/ENCFF532RXN/@@download/ENCFF532RXN.bed.gz	Other			transcription factor,chromatin remodeller,RNA binding protein	COG3170
PHF8	FLAG	Preferred	https://www.encodeproject.org/files/ENCFF127LBZ/@@download/ENCFF127LBZ.bed.gz	Other			transcription factor,chromatin remodeller,RNA binding protein	COG3170
PHTF1	FLAG	Preferred	https://www.ncbi.nlm.nih.gov/geo/download/?acc=GSM7503150&format=file&file=GSM7503150%5FPHTF1%2DFLAG%5FPreferred%5FLocal%2EnarrowPeak%2Egz	Other	No		transcription factor	COG0726
PITX1	FLAG	Preferred	https://www.encodeproject.org/files/ENCFF512NCZ/@@download/ENCFF512NCZ.bed.gz	TF	Yes		transcription factor	COG3064
PLRG1		Preferred	https://www.encodeproject.org/files/ENCFF251RCG/@@download/ENCFF251RCG.bed.gz	Other		mRNA splicing complex member, required for splicing initiation.	transcription factor	COG2319
PLSCR1	FLAG	Preferred	https://www.encodeproject.org/files/ENCFF327XJK/@@download/ENCFF327XJK.bed.gz	TF	Yes			COG0247
POGZ	FLAG	Preferred	https://www.encodeproject.org/files/ENCFF464PTM/@@download/ENCFF464PTM.bed.gz	Other	No		transcription factor	COG2870
POLR2A		Preferred	https://www.encodeproject.org/files/ENCFF505PXD/@@download/ENCFF505PXD.bed.gz	Other	No		transcription factor,chromatin remodeller	COG3209
POLR2A		Uncharacterized	https://www.encodeproject.org/files/ENCFF806UQS/@@download/ENCFF806UQS.bed.gz	Other	No		transcription factor,chromatin remodeller	COG3209
POLR2A		Uncharacterized	https://www.encodeproject.org/files/ENCFF663LEV/@@download/ENCFF663LEV.bed.gz	Other	No		transcription factor,chromatin remodeller	COG3209
POLR2AphosphoS2		Preferred	https://www.encodeproject.org/files/ENCFF400CVS/@@download/ENCFF400CVS.bed.gz	Other	No		other context,other post-translational modification,transcription factor
POLR2AphosphoS5		Preferred	https://www.encodeproject.org/files/ENCFF483FKZ/@@download/ENCFF483FKZ.bed.gz	Other	No		other context,other post-translational modification,transcription factor
POLR2G		Preferred	https://www.encodeproject.org/files/ENCFF496CJE/@@download/ENCFF496CJE.bed.gz	Other			RNA binding protein,transcription factor	COG2814
POU2F1	FLAG	Preferred	https://www.ncbi.nlm.nih.gov/geo/download/?acc=GSM7503151&format=file&file=GSM7503151%5FPOU2F1%2DFLAG%5FPreferred%5FLocal%2EnarrowPeak%2Egz	TF	Yes		transcription factor	COG3210
PPARG	FLAG	Preferred	https://www.encodeproject.org/files/ENCFF567JIZ/@@download/ENCFF567JIZ.bed.gz	TF	Yes		transcription factor	COG0635
PRDM10	FLAG	Preferred	https://www.encodeproject.org/files/ENCFF746BIW/@@download/ENCFF746BIW.bed.gz	TF	Yes		transcription factor	COG1198
PRDM15	FLAG	Preferred	https://www.encodeproject.org/files/ENCFF028CNE/@@download/ENCFF028CNE.bed.gz	TF	Yes		transcription factor	COG3464
PRDM4	FLAG	Preferred	https://www.ncbi.nlm.nih.gov/geo/download/?acc=GSM7503152&format=file&file=GSM7503152%5FPRDM4%2DFLAG%5FPreferred%5FLocal%2EnarrowPeak%2Egz	TF	Yes		transcription factor	COG3250
PREB	FLAG	Preferred	https://www.encodeproject.org/files/ENCFF624VRP/@@download/ENCFF624VRP.bed.gz	TF	Yes		transcription factor	COG2319
PRMT5	FLAG	Preferred	https://www.ncbi.nlm.nih.gov/geo/download/?acc=GSM7503153&format=file&file=GSM7503153%5FPRMT5%2DFLAG%5FPreferred%5FLocal%2EnarrowPeak%2Egz	Other		Methyltransferase. Methylates arginines, SUPT5H.	transcription factor	COG0438
PRPF4		Preferred	https://www.encodeproject.org/files/ENCFF719VLD/@@download/ENCFF719VLD.bed.gz	Other		Spliceosome B complex member.	RNA binding protein,transcription factor	COG2319
PTBP1		Preferred	https://www.encodeproject.org/files/ENCFF793YIO/@@download/ENCFF793YIO.bed.gz	Other		hnRNP family member, involved in exon skipping, RNA looping, splicing mahinery. Has rna recognition motif, no DNA binding domains.	RNA binding protein,transcription factor	COG0534
RAD21	FLAG	Uncharacterized	https://www.encodeproject.org/files/ENCFF786ZDM/@@download/ENCFF786ZDM.bed.gz	Other	No		transcription factor	COG1783
RAD21		Non-preferred	https://www.encodeproject.org/files/ENCFF986ECW/@@download/ENCFF986ECW.bed.gz	Other	No		transcription factor	COG1783
RAD21	eGFP	Uncharacterized	https://www.encodeproject.org/files/ENCFF049KLQ/@@download/ENCFF049KLQ.bed.gz	Other	No		transcription factor	COG1783
RAD21		Preferred	https://www.encodeproject.org/files/ENCFF171ZXN/@@download/ENCFF171ZXN.bed.gz	Other	No		transcription factor	COG1783
RAD51		Preferred	https://www.encodeproject.org/files/ENCFF932LVB/@@download/ENCFF932LVB.bed.gz	Other	No		transcription factor	COG0389
RARA	FLAG	Preferred	https://www.encodeproject.org/files/ENCFF051RBF/@@download/ENCFF051RBF.bed.gz	TF	Yes		transcription factor	COG2801
RARG	FLAG	Preferred	https://www.encodeproject.org/files/ENCFF660XKF/@@download/ENCFF660XKF.bed.gz	TF	Yes		transcription factor	COG1403
RBAK	FLAG	Preferred	https://www.encodeproject.org/files/ENCFF376YBW/@@download/ENCFF376YBW.bed.gz	TF	Yes		transcription factor	COG4469
RBFOX2		Preferred	https://www.encodeproject.org/files/ENCFF756RMH/@@download/ENCFF756RMH.bed.gz	Other		RNA splicing / binding protein. HAs interactions with ~32 proteins. Has rna recognition motif domain, but no clear DNA binding domain.	RNA binding protein,transcription factor	COG3266
RBM22		Preferred	https://www.encodeproject.org/files/ENCFF457BJI/@@download/ENCFF457BJI.bed.gz	Other	No		RNA binding protein,transcription factor	COG1652
RBM39		Preferred	https://www.encodeproject.org/files/ENCFF796LVD/@@download/ENCFF796LVD.bed.gz	Other		RNA binding protein that plays a role in splicing. Has RNA recognition motif domain, and interactions with several proteins including TFs, but no DNA binding domain.	RNA binding protein,transcription factor	COG0724
RBPJ	FLAG	Preferred	https://www.encodeproject.org/files/ENCFF303KJW/@@download/ENCFF303KJW.bed.gz	TF	Yes		transcription factor	COG1600
RCOR1		Preferred	https://www.encodeproject.org/files/ENCFF110WHS/@@download/ENCFF110WHS.bed.gz	Other	No		transcription factor	COG3409
RCOR2	FLAG	Preferred	https://www.encodeproject.org/files/ENCFF133ULI/@@download/ENCFF133ULI.bed.gz	Other	No		transcription factor	COG3409
RCOR3	FLAG	Preferred	https://www.ncbi.nlm.nih.gov/geo/download/?acc=GSM7503154&format=file&file=GSM7503154%5FRCOR3%2DFLAG%5FPreferred%5FLocal%2EnarrowPeak%2Egz	Other	No		transcription factor	COG0457
RELA	FLAG	Preferred	https://www.encodeproject.org/files/ENCFF588ZSF/@@download/ENCFF588ZSF.bed.gz	TF	Yes		transcription factor	COG0747
RERE	FLAG	Preferred	https://www.encodeproject.org/files/ENCFF283JPC/@@download/ENCFF283JPC.bed.gz	Other	No		transcription factor	COG0006
REST		Non-preferred	https://www.encodeproject.org/files/ENCFF128XEY/@@download/ENCFF128XEY.bed.gz	TF	Yes		transcription factor,chromatin remodeller	COG3210
REST		Preferred	https://www.encodeproject.org/files/ENCFF227COI/@@download/ENCFF227COI.bed.gz	TF	Yes		transcription factor,chromatin remodeller	COG3210
REV3L	FLAG	Preferred	https://www.ncbi.nlm.nih.gov/geo/download/?acc=GSM7503155&format=file&file=GSM7503155%5FREV3L%2DFLAG%5FPreferred%5FLocal%2EnarrowPeak%2Egz	Other		POLZ subunit		COG2801
RFX1		Preferred	https://www.encodeproject.org/files/ENCFF881BZS/@@download/ENCFF881BZS.bed.gz	TF	Yes		transcription factor	COG4886
RFX3	FLAG	Preferred	https://www.encodeproject.org/files/ENCFF388AKT/@@download/ENCFF388AKT.bed.gz	TF	Yes		transcription factor	COG1483
RFX5		Preferred	https://www.encodeproject.org/files/ENCFF170RLS/@@download/ENCFF170RLS.bed.gz	TF	Yes		transcription factor	COG0640
RFXANK	FLAG	Preferred	https://www.encodeproject.org/files/ENCFF731KLY/@@download/ENCFF731KLY.bed.gz	Other	No		transcription factor	COG2931
RFXAP	FLAG	Preferred	https://www.encodeproject.org/files/ENCFF985JDC/@@download/ENCFF985JDC.bed.gz	Other	No		transcription factor	COG0508
RNF2		Preferred	https://www.encodeproject.org/files/ENCFF052BXQ/@@download/ENCFF052BXQ.bed.gz	Other	No		transcription factor,chromatin remodeller	COG1403
OBI1	FLAG	Preferred	https://www.encodeproject.org/files/ENCFF216WUU/@@download/ENCFF216WUU.bed.gz	Other	No		transcription factor
RORA	FLAG	Preferred	https://www.encodeproject.org/files/ENCFF951EMJ/@@download/ENCFF951EMJ.bed.gz	TF	Yes		transcription factor	COG0517
RREB1	FLAG	Preferred	https://www.encodeproject.org/files/ENCFF397FIY/@@download/ENCFF397FIY.bed.gz	TF	Yes		transcription factor	COG1403
RXRA	FLAG	Preferred	https://www.encodeproject.org/files/ENCFF672JLN/@@download/ENCFF672JLN.bed.gz	TF	Yes		transcription factor	COG1403
RXRB	FLAG	Preferred	https://www.encodeproject.org/files/ENCFF055PGX/@@download/ENCFF055PGX.bed.gz	TF	Yes		transcription factor	COG3677
SAFB2	FLAG	Preferred	https://www.encodeproject.org/files/ENCFF867CMD/@@download/ENCFF867CMD.bed.gz	TF	Yes		RNA binding protein,transcription factor	COG2369
SALL1	FLAG	Preferred	https://www.ncbi.nlm.nih.gov/geo/download/?acc=GSM7503156&format=file&file=GSM7503156%5FSALL1%2DFLAG%5FPreferred%5FLocal%2EnarrowPeak%2Egz	TF	Yes		transcription factor	COG3170
SALL2	FLAG	Preferred	https://www.ncbi.nlm.nih.gov/geo/download/?acc=GSM7503157&format=file&file=GSM7503157%5FSALL2%2DFLAG%5FPreferred%5FLocal%2EnarrowPeak%2Egz	TF	Yes		transcription factor	COG1075
SAP130	FLAG	Preferred	https://www.encodeproject.org/files/ENCFF557KBX/@@download/ENCFF557KBX.bed.gz	Other			transcription factor	COG3209
SATB2	FLAG	Preferred	https://www.encodeproject.org/files/ENCFF231FHP/@@download/ENCFF231FHP.bed.gz	TF	Yes		transcription factor	COG2801
SCMH1	FLAG	Preferred	https://www.ncbi.nlm.nih.gov/geo/download/?acc=GSM7503158&format=file&file=GSM7503158%5FSCMH1%2DFLAG%5FPreferred%5FLocal%2EnarrowPeak%2Egz	TF	Yes			COG0726
SETDB1	FLAG	Preferred	https://www.encodeproject.org/files/ENCFF186ELR/@@download/ENCFF186ELR.bed.gz	Other	Yes*	Chromatin remodeller	transcription factor	COG0789
SFPQ		Non-preferred	https://www.encodeproject.org/files/ENCFF508RFK/@@download/ENCFF508RFK.bed.gz	Other	No		RNA binding protein,transcription factor	COG5295
SFPQ	FLAG	Preferred	https://www.encodeproject.org/files/ENCFF655NBG/@@download/ENCFF655NBG.bed.gz	Other	No		RNA binding protein,transcription factor	COG5295
SIN3A		Preferred	https://www.encodeproject.org/files/ENCFF803PTU/@@download/ENCFF803PTU.bed.gz	Other	No		transcription factor	COG3170
SIN3B		Preferred	https://www.encodeproject.org/files/ENCFF817MLD/@@download/ENCFF817MLD.bed.gz	Other	No		transcription factor	COG5635
SIX1	FLAG	Preferred	https://www.encodeproject.org/files/ENCFF885NXZ/@@download/ENCFF885NXZ.bed.gz	TF	Yes		transcription factor	COG3415
SIX4	FLAG	Preferred	https://www.encodeproject.org/files/ENCFF832KYL/@@download/ENCFF832KYL.bed.gz	TF	Yes		transcription factor	COG3266
SIX5	FLAG	Preferred	https://www.ncbi.nlm.nih.gov/geo/download/?acc=GSM7503159&format=file&file=GSM7503159%5FSIX5%2DFLAG%5FPreferred%5FLocal%2EnarrowPeak%2Egz	TF	Yes		transcription factor	COG3210
SKI		Preferred	https://www.encodeproject.org/files/ENCFF405UGF/@@download/ENCFF405UGF.bed.gz	TF	Yes		transcription factor	COG0535
SLC30A9	FLAG	Preferred	https://www.ncbi.nlm.nih.gov/geo/download/?acc=GSM7503160&format=file&file=GSM7503160%5FSLC30A9%2DFLAG%5FPreferred%5FLocal%2EnarrowPeak%2Egz	Other	No		transcription factor	COG0053
SMAD1	FLAG	Preferred	https://www.encodeproject.org/files/ENCFF224UON/@@download/ENCFF224UON.bed.gz	TF	Yes		transcription factor	COG3464
SMAD3	FLAG	Preferred	https://www.encodeproject.org/files/ENCFF514EHR/@@download/ENCFF514EHR.bed.gz	TF	Yes		transcription factor	COG2801
SMAD4	FLAG	Preferred	https://www.encodeproject.org/files/ENCFF828ZCI/@@download/ENCFF828ZCI.bed.gz	TF	Yes		transcription factor	COG1961
SMAD7	FLAG	Preferred	https://www.ncbi.nlm.nih.gov/geo/download/?acc=GSM7503161&format=file&file=GSM7503161%5FSMAD7%2DFLAG%5FPreferred%5FLocal%2EnarrowPeak%2Egz	Other	No		transcription factor	COG1470
SMAD9	FLAG	Preferred	https://www.encodeproject.org/files/ENCFF707VDL/@@download/ENCFF707VDL.bed.gz	TF	Yes		transcription factor	COG2207
SMARCC2		Preferred	https://www.encodeproject.org/files/ENCFF201OTL/@@download/ENCFF201OTL.bed.gz	Other	No		transcription factor	COG5164
SMARCE1		Preferred	https://www.encodeproject.org/files/ENCFF176QWL/@@download/ENCFF176QWL.bed.gz	Other	No		transcription factor	COG3170
SMC3		Preferred	https://www.encodeproject.org/files/ENCFF492IMA/@@download/ENCFF492IMA.bed.gz	Other	No		transcription factor	COG1196
SNAI1	FLAG	Preferred	https://www.encodeproject.org/files/ENCFF713BCF/@@download/ENCFF713BCF.bed.gz	TF	Yes		transcription factor	COG1996
SNAPC4	FLAG	Preferred	https://www.encodeproject.org/files/ENCFF003YHG/@@download/ENCFF003YHG.bed.gz	TF	Yes		transcription factor	COG3170
SNRNP70		Preferred	https://www.encodeproject.org/files/ENCFF310GVX/@@download/ENCFF310GVX.bed.gz	Other		Spliceosomal complex member. RNA recognition motif domain, interaction with several proteins, no DNA binding domain.	RNA binding protein,transcription factor	COG2801
SOX13	eGFP	Non-preferred	https://www.encodeproject.org/files/ENCFF935NRC/@@download/ENCFF935NRC.bed.gz	TF	Yes		transcription factor	COG4104
SOX13		Non-preferred	https://www.encodeproject.org/files/ENCFF972VWQ/@@download/ENCFF972VWQ.bed.gz	TF	Yes		transcription factor	COG4104
SOX13	FLAG	Preferred	https://www.encodeproject.org/files/ENCFF344LWH/@@download/ENCFF344LWH.bed.gz	TF	Yes		transcription factor	COG4104
SOX18	FLAG	Preferred	https://www.encodeproject.org/files/ENCFF139MAW/@@download/ENCFF139MAW.bed.gz	TF	Yes		transcription factor	COG1595
SOX5	FLAG	Preferred	https://www.encodeproject.org/files/ENCFF572TDN/@@download/ENCFF572TDN.bed.gz	TF	Yes		transcription factor	COG3170
SOX6	FLAG	Preferred	https://www.encodeproject.org/files/ENCFF677LEF/@@download/ENCFF677LEF.bed.gz	TF	Yes		transcription factor	COG3409
SOX6		Non-preferred	https://www.encodeproject.org/files/ENCFF224ACO/@@download/ENCFF224ACO.bed.gz	TF	Yes		transcription factor	COG3409
SP1		Preferred	https://www.encodeproject.org/files/ENCFF316YEL/@@download/ENCFF316YEL.bed.gz	TF	Yes		transcription factor	COG3266
SP1	FLAG	Non-preferred	https://www.encodeproject.org/files/ENCFF022SPK/@@download/ENCFF022SPK.bed.gz	TF	Yes		transcription factor	COG3266
SP110	FLAG	Preferred	https://www.ncbi.nlm.nih.gov/geo/download/?acc=GSM7503162&format=file&file=GSM7503162%5FSP110%2DFLAG%5FPreferred%5FLocal%2EnarrowPeak%2Egz	TF	Yes		transcription factor	COG1403
SP140L	FLAG	Preferred	https://www.encodeproject.org/files/ENCFF452TPH/@@download/ENCFF452TPH.bed.gz	TF	Yes		transcription factor	COG1961
SP2	FLAG	Preferred	https://www.encodeproject.org/files/ENCFF766ULD/@@download/ENCFF766ULD.bed.gz	TF	Yes		transcription factor	COG3293
SP2		Non-preferred	https://www.encodeproject.org/files/ENCFF962KEP/@@download/ENCFF962KEP.bed.gz	TF	Yes		transcription factor	COG3293
SP5	FLAG	Preferred	https://www.encodeproject.org/files/ENCFF997EZO/@@download/ENCFF997EZO.bed.gz	TF	Yes		transcription factor	COG1403
SPEN	FLAG	Preferred	https://www.encodeproject.org/files/ENCFF505DKE/@@download/ENCFF505DKE.bed.gz	TF	Yes		RNA binding protein,transcription factor	COG0582
SRF		Preferred	https://www.encodeproject.org/files/ENCFF299ZUK/@@download/ENCFF299ZUK.bed.gz	TF	Yes		transcription factor	COG0810
SRSF1		Preferred	https://www.encodeproject.org/files/ENCFF321UQK/@@download/ENCFF321UQK.bed.gz	Other		Spliceosomal complex member. Multiple RNA recognition domains, protein interaction domain with SAFB1, no DNA binding domain.	RNA binding protein,transcription factor	COG0724
SRSF4		Preferred	https://www.encodeproject.org/files/ENCFF427GBB/@@download/ENCFF427GBB.bed.gz	Other		Spliceosomal complex member, Multiple RNA recognition domains, no DNA binding domain.	RNA binding protein,transcription factor	COG0724
SRSF9		Preferred	https://www.encodeproject.org/files/ENCFF342SIN/@@download/ENCFF342SIN.bed.gz	Other		Spliceosomal complex member. Note that it explicitly supresses the splicing of MAPT exon 10. Multiple RNA recognition domains, domain speifically interacts with SAFB1. No DNA Binding domain.	RNA binding protein,transcription factor	COG0724
SRY	FLAG	Preferred	https://www.ncbi.nlm.nih.gov/geo/download/?acc=GSM7503163&format=file&file=GSM7503163%5FSRY%2DFLAG%5FPreferred%5FLocal%2EnarrowPeak%2Egz	TF	Yes		transcription factor	COG1403
SSRP1	FLAG	Preferred	https://www.encodeproject.org/files/ENCFF712IPK/@@download/ENCFF712IPK.bed.gz	Other	No		RNA binding protein,transcription factor	COG3170
STAG1	FLAG	Preferred	https://www.encodeproject.org/files/ENCFF514OVO/@@download/ENCFF514OVO.bed.gz	Other	No		transcription factor	COG5635
STAT5A	FLAG	Preferred	https://www.ncbi.nlm.nih.gov/geo/download/?acc=GSM7503164&format=file&file=GSM7503164%5FSTAT5A%2DFLAG%5FPreferred%5FLocal%2EnarrowPeak%2Egz	TF	Yes		transcription factor	COG1309
STAT5B	FLAG	Preferred	https://www.encodeproject.org/files/ENCFF734DQW/@@download/ENCFF734DQW.bed.gz	TF	Yes		transcription factor	COG0846
STAT6	FLAG	Preferred	https://www.encodeproject.org/files/ENCFF009YMJ/@@download/ENCFF009YMJ.bed.gz	TF	Yes		transcription factor	COG0463
SUZ12		Preferred	https://www.encodeproject.org/files/ENCFF482HFQ/@@download/ENCFF482HFQ.bed.gz	Other	No		transcription factor,chromatin remodeller,RNA binding protein	COG3170
SYNCRIP		Preferred	https://www.encodeproject.org/files/ENCFF449IXP/@@download/ENCFF449IXP.bed.gz	Other		hnRNP complex member, involved in splicing. Multiple RNA recognition motif domains. Domains speifically interacting with APOBEC1 and SMN. No DNA binding domain.	RNA binding protein,transcription factor	COG0724
TAF1	FLAG	Preferred	https://www.encodeproject.org/files/ENCFF859JSG/@@download/ENCFF859JSG.bed.gz	Other	No		transcription factor	COG1002
TAF1		Non-preferred	https://www.encodeproject.org/files/ENCFF793EAH/@@download/ENCFF793EAH.bed.gz	Other	No		transcription factor	COG1002
TAF15		Preferred	https://www.encodeproject.org/files/ENCFF889SKN/@@download/ENCFF889SKN.bed.gz	Other		Binds RNA and ssDNA. Has a RanBP2-type Zinc Finger domain, involved in RNA binding and possibly protein interactions. Has RNA recognition motif domain, no clear interactino domains or DNA binding domains.	RNA binding protein,transcription factor	COG1525
TARDBP		Preferred	https://www.encodeproject.org/files/ENCFF978CQE/@@download/ENCFF978CQE.bed.gz	Other	No		RNA binding protein,transcription factor	COG0724
TBL1XR1		Preferred	https://www.encodeproject.org/files/ENCFF694AOE/@@download/ENCFF694AOE.bed.gz	Other			transcription factor	COG2319
TBP	FLAG	Preferred	https://www.encodeproject.org/files/ENCFF935CJP/@@download/ENCFF935CJP.bed.gz	TF	Yes		transcription factor	COG3064
TBP		Non-preferred	https://www.encodeproject.org/files/ENCFF146NGT/@@download/ENCFF146NGT.bed.gz	TF	Yes		transcription factor	COG3064
TBX2	FLAG	Preferred	https://www.encodeproject.org/files/ENCFF162BJS/@@download/ENCFF162BJS.bed.gz	TF	Yes		transcription factor	COG2755
TBX3		Non-preferred	https://www.encodeproject.org/files/ENCFF279ROV/@@download/ENCFF279ROV.bed.gz	TF	Yes		transcription factor	COG2755
TBX3		Preferred	https://www.encodeproject.org/files/ENCFF757KHZ/@@download/ENCFF757KHZ.bed.gz	TF	Yes		transcription factor	COG2755
TCF12		Preferred	https://www.encodeproject.org/files/ENCFF518GBI/@@download/ENCFF518GBI.bed.gz	TF	Yes		transcription factor	COG3266
TCF3	FLAG	Preferred	https://www.encodeproject.org/files/ENCFF825QLF/@@download/ENCFF825QLF.bed.gz	TF	Yes		transcription factor	COG3729
TCF7		Preferred	https://www.encodeproject.org/files/ENCFF646DDZ/@@download/ENCFF646DDZ.bed.gz	TF	Yes		transcription factor	COG1595
TCF7L2		Non-preferred	https://www.encodeproject.org/files/ENCFF407LPM/@@download/ENCFF407LPM.bed.gz	TF	Yes		transcription factor	COG1595
TCF7L2	FLAG	Preferred	https://www.encodeproject.org/files/ENCFF276DAQ/@@download/ENCFF276DAQ.bed.gz	TF	Yes		transcription factor	COG1595
TEAD1	FLAG	Preferred	https://www.encodeproject.org/files/ENCFF715HFB/@@download/ENCFF715HFB.bed.gz	TF	Yes		transcription factor	COG0484
TEAD2	FLAG	Preferred	https://www.ncbi.nlm.nih.gov/geo/download/?acc=GSM7503165&format=file&file=GSM7503165%5FTEAD2%2DFLAG%5FPreferred%5FLocal%2EnarrowPeak%2Egz	TF	Yes		transcription factor	COG3409
TEAD3	FLAG	Preferred	https://www.encodeproject.org/files/ENCFF467MXY/@@download/ENCFF467MXY.bed.gz	TF	Yes		transcription factor	COG0388
TEAD4	FLAG	Preferred	https://www.encodeproject.org/files/ENCFF392AXI/@@download/ENCFF392AXI.bed.gz	TF	Yes		transcription factor	COG2230
TEF	FLAG	Preferred	https://www.encodeproject.org/files/ENCFF019SUK/@@download/ENCFF019SUK.bed.gz	TF	Yes		transcription factor	COG1196
TFAP4		Non-preferred	https://www.encodeproject.org/files/ENCFF129CAQ/@@download/ENCFF129CAQ.bed.gz	TF	Yes		transcription factor	COG1196
TFAP4	FLAG	Preferred	https://www.encodeproject.org/files/ENCFF831LHT/@@download/ENCFF831LHT.bed.gz	TF	Yes		transcription factor	COG1196
TFDP1	FLAG	Preferred	https://www.encodeproject.org/files/ENCFF260VQA/@@download/ENCFF260VQA.bed.gz	TF	Yes		transcription factor	COG2865
TFDP2	FLAG	Preferred	https://www.encodeproject.org/files/ENCFF632WZL/@@download/ENCFF632WZL.bed.gz	TF	Yes		transcription factor	COG0457
TFE3	FLAG	Preferred	https://www.encodeproject.org/files/ENCFF911OIW/@@download/ENCFF911OIW.bed.gz	TF	Yes		transcription factor	COG1917
TGIF2	FLAG	Preferred	https://www.encodeproject.org/files/ENCFF584UVU/@@download/ENCFF584UVU.bed.gz	TF	Yes		transcription factor	COG2135
THAP1	FLAG	Preferred	https://www.ncbi.nlm.nih.gov/geo/download/?acc=GSM7503166&format=file&file=GSM7503166%5FTHAP1%2DFLAG%5FPreferred%5FLocal%2EnarrowPeak%2Egz	TF	Yes		transcription factor	COG4372
THAP11	FLAG	Preferred	https://www.encodeproject.org/files/ENCFF397AJQ/@@download/ENCFF397AJQ.bed.gz	TF	Yes		transcription factor	COG3064
THAP8	FLAG	Preferred	https://www.encodeproject.org/files/ENCFF978LWA/@@download/ENCFF978LWA.bed.gz	TF	Yes		transcription factor	COG1403
THAP9	FLAG	Preferred	https://www.encodeproject.org/files/ENCFF573HLA/@@download/ENCFF573HLA.bed.gz	TF	Yes		transcription factor	COG2814
THRA	FLAG	Preferred	https://www.encodeproject.org/files/ENCFF270VIF/@@download/ENCFF270VIF.bed.gz	TF	Yes		transcription factor	COG2814
THRB	FLAG	Preferred	https://www.encodeproject.org/files/ENCFF013IAW/@@download/ENCFF013IAW.bed.gz	TF	Yes		transcription factor	COG3677
TIGD3	FLAG	Preferred	https://www.encodeproject.org/files/ENCFF638OVC/@@download/ENCFF638OVC.bed.gz	TF	Yes		transcription factor	COG1396
TIGD6	FLAG	Preferred	https://www.encodeproject.org/files/ENCFF020JNK/@@download/ENCFF020JNK.bed.gz	TF	Yes		transcription factor	COG2197
TOE1	FLAG	Preferred	https://www.encodeproject.org/files/ENCFF013QQG/@@download/ENCFF013QQG.bed.gz	Other	No		RNA binding protein,transcription factor	COG0810
TOE1		Non-preferred	https://www.encodeproject.org/files/ENCFF729YSB/@@download/ENCFF729YSB.bed.gz	Other	No		RNA binding protein,transcription factor	COG0810
TP53	FLAG	Preferred	https://www.encodeproject.org/files/ENCFF701DTE/@@download/ENCFF701DTE.bed.gz	TF	Yes		transcription factor	COG4638
TRAFD1	FLAG	Preferred	https://www.encodeproject.org/files/ENCFF967GSO/@@download/ENCFF967GSO.bed.gz	TF	Yes		transcription factor	COG1403
TRIM22		Preferred	https://www.encodeproject.org/files/ENCFF922DRK/@@download/ENCFF922DRK.bed.gz	Other	No		transcription factor	COG1403
TRIM24	FLAG	Preferred	https://www.ncbi.nlm.nih.gov/geo/download/?acc=GSM7503167&format=file&file=GSM7503167%5FTRIM24%2DFLAG%5FPreferred%5FLocal%2EnarrowPeak%2Egz	Other	No		transcription factor	COG1403
TSC22D2	FLAG	Non-preferred	https://www.ncbi.nlm.nih.gov/geo/download/?acc=GSM7503168&format=file&file=GSM7503168%5FTSC22D2%2DFLAG%5FNon%2Dpreferred%5FLocal%2EnarrowPeak%2Egz	Other	No		transcription factor	COG3266
TSC22D2	FLAG	Preferred	https://www.encodeproject.org/files/ENCFF640ZVQ/@@download/ENCFF640ZVQ.bed.gz	Other	No		transcription factor	COG3266
TTF1	FLAG	Preferred	https://www.ncbi.nlm.nih.gov/geo/download/?acc=GSM7503169&format=file&file=GSM7503169%5FTTF1%2DFLAG%5FPreferred%5FLocal%2EnarrowPeak%2Egz	TF	Yes		transcription factor	COG3464
U2AF1		Preferred	https://www.encodeproject.org/files/ENCFF057MJF/@@download/ENCFF057MJF.bed.gz	Other	No		RNA binding protein,transcription factor	COG1403
U2AF2		Preferred	https://www.encodeproject.org/files/ENCFF419PQH/@@download/ENCFF419PQH.bed.gz	Other		Involved in RNA splicing complex. RNA recognition motif domains. Domain for interaction with PRPF19. No clear DNa binding domain.	RNA binding protein,transcription factor	COG0724
UBTF	FLAG	Preferred	https://www.encodeproject.org/files/ENCFF056VDP/@@download/ENCFF056VDP.bed.gz	Other	No		transcription factor	COG3935
USF1		Non-preferred	https://www.encodeproject.org/files/ENCFF251RJB/@@download/ENCFF251RJB.bed.gz	TF	Yes		transcription factor	COG1961
USF1	FLAG	Preferred	https://www.encodeproject.org/files/ENCFF048LKP/@@download/ENCFF048LKP.bed.gz	TF	Yes		transcription factor	COG1961
USF2	FLAG	Non-preferred	https://www.encodeproject.org/files/ENCFF759SUT/@@download/ENCFF759SUT.bed.gz	TF	Yes		transcription factor	COG1196
USF2		Preferred	https://www.encodeproject.org/files/ENCFF146UBH/@@download/ENCFF146UBH.bed.gz	TF	Yes		transcription factor	COG1196
WIZ	FLAG	Preferred	https://www.encodeproject.org/files/ENCFF720IGS/@@download/ENCFF720IGS.bed.gz	TF	Yes		transcription factor	COG0247
XBP1	FLAG	Preferred	https://www.encodeproject.org/files/ENCFF144DWU/@@download/ENCFF144DWU.bed.gz	TF	Yes		transcription factor	COG2963
XRCC5		Preferred	https://www.encodeproject.org/files/ENCFF305SZV/@@download/ENCFF305SZV.bed.gz	Other		Also called CTCBF. Has leucine zipper domain, suggesting sequence specific DNA binding. Involved in DNA ds break repair. EEXXXDL motif interacts with PRKDC to effect DNA repair. With APEX1, acts as a negative regulator of transcription.	RNA binding protein,transcription factor	COG2304
YBX1		Preferred	https://www.encodeproject.org/files/ENCFF813SPM/@@download/ENCFF813SPM.bed.gz	TF	Yes		RNA binding protein,transcription factor	COG1278
YEATS2	FLAG	Preferred	https://www.encodeproject.org/files/ENCFF492KIV/@@download/ENCFF492KIV.bed.gz	Other	No		transcription factor	COG1388
YEATS4	FLAG	Preferred	https://www.encodeproject.org/files/ENCFF269IHN/@@download/ENCFF269IHN.bed.gz	Other	No		transcription factor	COG1196
ZBED4	FLAG	Preferred	https://www.encodeproject.org/files/ENCFF888EIP/@@download/ENCFF888EIP.bed.gz	TF	Yes		transcription factor	COG1403
ZBED5	FLAG	Preferred	https://www.encodeproject.org/files/ENCFF733WWA/@@download/ENCFF733WWA.bed.gz	TF	Yes		transcription factor	COG3706
ZBTB1	FLAG	Preferred	https://www.encodeproject.org/files/ENCFF345UAC/@@download/ENCFF345UAC.bed.gz	TF	Yes		transcription factor	COG1539
ZBTB10	FLAG	Preferred	https://www.encodeproject.org/files/ENCFF095JZV/@@download/ENCFF095JZV.bed.gz	TF	Yes		transcription factor	COG0675
ZBTB12	FLAG	Preferred	https://www.ncbi.nlm.nih.gov/geo/download/?acc=GSM7503170&format=file&file=GSM7503170%5FZBTB12%2DFLAG%5FPreferred%5FLocal%2EnarrowPeak%2Egz	TF	Yes		transcription factor	COG1996
ZBTB14	FLAG	Preferred	https://www.encodeproject.org/files/ENCFF072ENL/@@download/ENCFF072ENL.bed.gz	TF	Yes		transcription factor	COG0675
ZBTB21	FLAG	Preferred	https://www.encodeproject.org/files/ENCFF347JXF/@@download/ENCFF347JXF.bed.gz	TF	Yes		transcription factor	COG1198
ZBTB22	FLAG	Preferred	https://www.ncbi.nlm.nih.gov/geo/download/?acc=GSM7503171&format=file&file=GSM7503171%5FZBTB22%2DFLAG%5FPreferred%5FLocal%2EnarrowPeak%2Egz	TF	Yes		transcription factor	COG1716
ZBTB24	FLAG	Preferred	https://www.encodeproject.org/files/ENCFF702ULZ/@@download/ENCFF702ULZ.bed.gz	TF	Yes		transcription factor	COG3464
ZBTB25	FLAG	Preferred	https://www.encodeproject.org/files/ENCFF398WWD/@@download/ENCFF398WWD.bed.gz	TF	Yes		transcription factor	COG1309
ZBTB26	FLAG	Preferred	https://www.encodeproject.org/files/ENCFF358WAV/@@download/ENCFF358WAV.bed.gz	TF	Yes		transcription factor	COG3464
ZBTB3	FLAG	Preferred	https://www.encodeproject.org/files/ENCFF972RKU/@@download/ENCFF972RKU.bed.gz	TF	Yes		transcription factor	COG3321
ZBTB33		Non-preferred	https://www.encodeproject.org/files/ENCFF798PND/@@download/ENCFF798PND.bed.gz	TF	Yes		transcription factor	COG5512
ZBTB33		Preferred	https://www.encodeproject.org/files/ENCFF037RRM/@@download/ENCFF037RRM.bed.gz	TF	Yes		transcription factor	COG5512
ZBTB33	FLAG	Uncharacterized	https://www.encodeproject.org/files/ENCFF982XKW/@@download/ENCFF982XKW.bed.gz	TF	Yes		transcription factor	COG5512
ZBTB37	FLAG	Preferred	https://www.encodeproject.org/files/ENCFF152JUI/@@download/ENCFF152JUI.bed.gz	TF	Yes		transcription factor	COG2865
ZBTB38	FLAG	Preferred	https://www.encodeproject.org/files/ENCFF675MHC/@@download/ENCFF675MHC.bed.gz	TF	Yes		transcription factor	COG0456
ZBTB39	FLAG	Preferred	https://www.encodeproject.org/files/ENCFF036DSO/@@download/ENCFF036DSO.bed.gz	TF	Yes		transcription factor	COG3880
ZBTB4	FLAG	Preferred	https://www.encodeproject.org/files/ENCFF628ORL/@@download/ENCFF628ORL.bed.gz	TF	Yes		transcription factor	COG3170
ZBTB40		Preferred	https://www.encodeproject.org/files/ENCFF195FFN/@@download/ENCFF195FFN.bed.gz	TF	Yes		transcription factor	COG0457
ZBTB42	FLAG	Preferred	https://www.encodeproject.org/files/ENCFF237WOL/@@download/ENCFF237WOL.bed.gz	TF	Yes		transcription factor	COG1403
ZBTB43	FLAG	Preferred	https://www.encodeproject.org/files/ENCFF499KOY/@@download/ENCFF499KOY.bed.gz	TF	Yes		transcription factor	COG1403
ZBTB44	FLAG	Preferred	https://www.encodeproject.org/files/ENCFF173WCV/@@download/ENCFF173WCV.bed.gz	TF	Yes		transcription factor	COG3464
ZBTB46	FLAG	Preferred	https://www.encodeproject.org/files/ENCFF995QXT/@@download/ENCFF995QXT.bed.gz	TF	Yes		transcription factor	COG1403
ZBTB47	FLAG	Preferred	https://www.ncbi.nlm.nih.gov/geo/download/?acc=GSM7503172&format=file&file=GSM7503172%5FZBTB47%2DFLAG%5FPreferred%5FLocal%2EnarrowPeak%2Egz	TF	Yes		transcription factor	COG1403
ZBTB49	FLAG	Preferred	https://www.encodeproject.org/files/ENCFF586SMO/@@download/ENCFF586SMO.bed.gz	TF	Yes		transcription factor	COG1403
ZBTB7A		Preferred	https://www.encodeproject.org/files/ENCFF771MKA/@@download/ENCFF771MKA.bed.gz	TF	Yes		transcription factor	COG1403
ZBTB7B	FLAG	Preferred	https://www.encodeproject.org/files/ENCFF033TLV/@@download/ENCFF033TLV.bed.gz	TF	Yes		transcription factor	COG1403
ZBTB8A	FLAG	Preferred	https://www.encodeproject.org/files/ENCFF659VBS/@@download/ENCFF659VBS.bed.gz	TF	Yes		transcription factor	COG1403
ZC3H4	FLAG	Preferred	https://www.encodeproject.org/files/ENCFF035JQZ/@@download/ENCFF035JQZ.bed.gz	Other	No		RNA binding protein,transcription factor	COG3064
ZC3H8	FLAG	Preferred	https://www.encodeproject.org/files/ENCFF710WEN/@@download/ENCFF710WEN.bed.gz	TF	Yes		RNA binding protein,transcription factor	COG0827
TUT4	FLAG	Non-preferred	https://www.ncbi.nlm.nih.gov/geo/download/?acc=GSM7503173&format=file&file=GSM7503173%5FZCCHC11%2DFLAG%5FNon%2Dpreferred%5FLocal%2EnarrowPeak%2Egz	Other	No		RNA binding protein,transcription factor
TUT4	FLAG	Preferred	https://www.encodeproject.org/files/ENCFF748PEB/@@download/ENCFF748PEB.bed.gz	Other	No		RNA binding protein,transcription factor
ZFAT	FLAG	Preferred	https://www.ncbi.nlm.nih.gov/geo/download/?acc=GSM7503174&format=file&file=GSM7503174%5FZFAT%2DFLAG%5FPreferred%5FLocal%2EnarrowPeak%2Egz	TF	Yes		transcription factor	COG3383
ZFHX3	FLAG	Preferred	https://www.ncbi.nlm.nih.gov/geo/download/?acc=GSM7503175&format=file&file=GSM7503175%5FZFHX3%2DFLAG%5FPreferred%5FLocal%2EnarrowPeak%2Egz	TF	Yes		transcription factor	COG3210
ZFP1	FLAG	Preferred	https://www.encodeproject.org/files/ENCFF317DBA/@@download/ENCFF317DBA.bed.gz	TF	Yes		transcription factor	COG2963
ZFP14	FLAG	Preferred	https://www.encodeproject.org/files/ENCFF702UPM/@@download/ENCFF702UPM.bed.gz	TF	Yes		transcription factor	COG3677
ZFP36		Preferred	https://www.encodeproject.org/files/ENCFF660SCE/@@download/ENCFF660SCE.bed.gz	Other	No		RNA binding protein,transcription factor	COG3791
ZFP36L2	FLAG	Preferred	https://www.encodeproject.org/files/ENCFF743BHX/@@download/ENCFF743BHX.bed.gz	Other	No		RNA binding protein,transcription factor	COG5297
ZFP37	FLAG	Preferred	https://www.encodeproject.org/files/ENCFF148XUP/@@download/ENCFF148XUP.bed.gz	TF	Yes		transcription factor	COG1961
ZFP41	FLAG	Preferred	https://www.encodeproject.org/files/ENCFF833OHI/@@download/ENCFF833OHI.bed.gz	TF	Yes		transcription factor	COG1198
ZFP62	FLAG	Preferred	https://www.encodeproject.org/files/ENCFF428YYT/@@download/ENCFF428YYT.bed.gz	TF	Yes		transcription factor	COG3677
ZFP64	FLAG	Preferred	https://www.encodeproject.org/files/ENCFF895ZWZ/@@download/ENCFF895ZWZ.bed.gz	TF	Yes		transcription factor	COG1064
ZFP82	FLAG	Preferred	https://www.encodeproject.org/files/ENCFF927WNG/@@download/ENCFF927WNG.bed.gz	TF	Yes		transcription factor	COG3460
ZFP90	FLAG	Preferred	https://www.ncbi.nlm.nih.gov/geo/download/?acc=GSM7503176&format=file&file=GSM7503176%5FZFP90%2DFLAG%5FPreferred%5FLocal%2EnarrowPeak%2Egz	TF	Yes		transcription factor	COG2801
ZFP91	FLAG	Preferred	https://www.ncbi.nlm.nih.gov/geo/download/?acc=GSM7503177&format=file&file=GSM7503177%5FZFP91%2DFLAG%5FPreferred%5FLocal%2EnarrowPeak%2Egz	TF	Yes		transcription factor	COG3677
ZFX	FLAG	Preferred	https://www.encodeproject.org/files/ENCFF098VWY/@@download/ENCFF098VWY.bed.gz	TF	Yes		transcription factor	COG1598
ZFY	FLAG	Preferred	https://www.encodeproject.org/files/ENCFF968XPF/@@download/ENCFF968XPF.bed.gz	TF	Yes		transcription factor	COG1403
ZGLP1	FLAG	Preferred	https://www.ncbi.nlm.nih.gov/geo/download/?acc=GSM7503178&format=file&file=GSM7503178%5FZGLP1%2DFLAG%5FPreferred%5FLocal%2EnarrowPeak%2Egz	TF	Yes		transcription factor	COG1040
ZGPAT	FLAG	Preferred	https://www.encodeproject.org/files/ENCFF329HLR/@@download/ENCFF329HLR.bed.gz	TF	Yes		RNA binding protein,transcription factor	COG1196
ZHX2		Preferred	https://www.encodeproject.org/files/ENCFF556OVK/@@download/ENCFF556OVK.bed.gz	TF	Yes		transcription factor	COG4974
ZHX3	FLAG	Preferred	https://www.encodeproject.org/files/ENCFF982WOX/@@download/ENCFF982WOX.bed.gz	TF	Yes		transcription factor	COG1475
ZIK1	FLAG	Preferred	https://www.encodeproject.org/files/ENCFF149DFX/@@download/ENCFF149DFX.bed.gz	TF	Yes		transcription factor	COG1359
ZIM2	FLAG	Preferred	https://www.ncbi.nlm.nih.gov/geo/download/?acc=GSM7503179&format=file&file=GSM7503179%5FZIM2%2DFLAG%5FPreferred%5FLocal%2EnarrowPeak%2Egz	TF	Yes		transcription factor	COG1403
ZKSCAN1		Preferred	https://www.encodeproject.org/files/ENCFF050IGN/@@download/ENCFF050IGN.bed.gz	TF	Yes		transcription factor	COG3677
ZKSCAN5	FLAG	Preferred	https://www.encodeproject.org/files/ENCFF648UYI/@@download/ENCFF648UYI.bed.gz	TF	Yes		transcription factor	COG0484
ZKSCAN8	FLAG	Preferred	https://www.encodeproject.org/files/ENCFF796GOO/@@download/ENCFF796GOO.bed.gz	TF	Yes		transcription factor	COG5512
ZMAT3	FLAG	Preferred	https://www.encodeproject.org/files/ENCFF981WJF/@@download/ENCFF981WJF.bed.gz	Other	No		RNA binding protein,transcription factor	COG1716
ZMAT5	FLAG	Preferred	https://www.encodeproject.org/files/ENCFF079GRV/@@download/ENCFF079GRV.bed.gz	Other	No		transcription factor	COG3677
ZMYM2	FLAG	Preferred	https://www.ncbi.nlm.nih.gov/geo/download/?acc=GSM7503180&format=file&file=GSM7503180%5FZMYM2%2DFLAG%5FPreferred%5FLocal%2EnarrowPeak%2Egz	Other	No		transcription factor	COG0484
ZMYM3	FLAG	Preferred	https://www.encodeproject.org/files/ENCFF128YWI/@@download/ENCFF128YWI.bed.gz	Other	No		transcription factor	COG0437
ZMYM3		Non-preferred	https://www.encodeproject.org/files/ENCFF177JJB/@@download/ENCFF177JJB.bed.gz	Other	No		transcription factor	COG0437
ZMYM4	FLAG	Preferred	https://www.ncbi.nlm.nih.gov/geo/download/?acc=GSM7503181&format=file&file=GSM7503181%5FZMYM4%2DFLAG%5FPreferred%5FLocal%2EnarrowPeak%2Egz	Other	No			COG1579
ZNF10	FLAG	Preferred	https://www.encodeproject.org/files/ENCFF696UAH/@@download/ENCFF696UAH.bed.gz	TF	Yes		transcription factor	COG3293
ZNF101	FLAG	Preferred	https://www.encodeproject.org/files/ENCFF719YFZ/@@download/ENCFF719YFZ.bed.gz	TF	Yes		transcription factor	COG0675
ZNF12	FLAG	Preferred	https://www.encodeproject.org/files/ENCFF842COU/@@download/ENCFF842COU.bed.gz	TF	Yes		transcription factor	COG3677
ZNF121	FLAG	Preferred	https://www.encodeproject.org/files/ENCFF817UOJ/@@download/ENCFF817UOJ.bed.gz	TF	Yes		transcription factor	COG3677
ZNF124	FLAG	Preferred	https://www.encodeproject.org/files/ENCFF359JWK/@@download/ENCFF359JWK.bed.gz	TF	Yes		transcription factor	COG3210
ZNF138	FLAG	Preferred	https://www.encodeproject.org/files/ENCFF429RZD/@@download/ENCFF429RZD.bed.gz	TF	Yes		transcription factor	COG3677
ZNF140	FLAG	Preferred	https://www.ncbi.nlm.nih.gov/geo/download/?acc=GSM7503182&format=file&file=GSM7503182%5FZNF140%2DFLAG%5FPreferred%5FLocal%2EnarrowPeak%2Egz	TF	Yes		transcription factor	COG3677
ZNF142	FLAG	Preferred	https://www.encodeproject.org/files/ENCFF193QNN/@@download/ENCFF193QNN.bed.gz	TF	Yes		transcription factor	COG1452
ZNF143	FLAG	Preferred	https://www.encodeproject.org/files/ENCFF764XBK/@@download/ENCFF764XBK.bed.gz	TF	Yes		transcription factor	COG1917
ZNF148	FLAG	Preferred	https://www.ncbi.nlm.nih.gov/geo/download/?acc=GSM7503183&format=file&file=GSM7503183%5FZNF148%2DFLAG%5FPreferred%5FLocal%2EnarrowPeak%2Egz	TF	Yes		transcription factor	COG1403
ZNF160	FLAG	Preferred	https://www.ncbi.nlm.nih.gov/geo/download/?acc=GSM7503184&format=file&file=GSM7503184%5FZNF160%2DFLAG%5FPreferred%5FLocal%2EnarrowPeak%2Egz	TF	Yes		transcription factor	COG3677
ZNF17	FLAG	Preferred	https://www.encodeproject.org/files/ENCFF855DRG/@@download/ENCFF855DRG.bed.gz	TF	Yes		transcription factor	COG3464
ZNF18	FLAG	Preferred	https://www.ncbi.nlm.nih.gov/geo/download/?acc=GSM7503185&format=file&file=GSM7503185%5FZNF18%2DFLAG%5FPreferred%5FLocal%2EnarrowPeak%2Egz	TF	Yes		transcription factor	COG3677
ZNF180	FLAG	Preferred	https://www.encodeproject.org/files/ENCFF745TIW/@@download/ENCFF745TIW.bed.gz	TF	Yes		transcription factor	COG3677
ZNF20	FLAG	Preferred	https://www.encodeproject.org/files/ENCFF950PRR/@@download/ENCFF950PRR.bed.gz	TF	Yes		transcription factor	COG3039
ZNF205	FLAG	Preferred	https://www.encodeproject.org/files/ENCFF482IUF/@@download/ENCFF482IUF.bed.gz	TF	Yes		transcription factor	COG0675
ZNF207		Preferred	https://www.encodeproject.org/files/ENCFF967UKB/@@download/ENCFF967UKB.bed.gz	TF	Yes		transcription factor	COG1403
ZNF217	FLAG	Preferred	https://www.encodeproject.org/files/ENCFF696RIZ/@@download/ENCFF696RIZ.bed.gz	TF	Yes		transcription factor	COG0484
ZNF219	FLAG	Preferred	https://www.ncbi.nlm.nih.gov/geo/download/?acc=GSM7503186&format=file&file=GSM7503186%5FZNF219%2DFLAG%5FPreferred%5FLocal%2EnarrowPeak%2Egz	TF	Yes		transcription factor	COG0484
ZNF222	FLAG	Preferred	https://www.ncbi.nlm.nih.gov/geo/download/?acc=GSM7503188&format=file&file=GSM7503188%5FZNF222%2DFLAG%5FPreferred%5FLocal%2EnarrowPeak%2Egz	TF	Yes		transcription factor	COG0789
ZNF224	FLAG	Preferred	https://www.encodeproject.org/files/ENCFF635RWF/@@download/ENCFF635RWF.bed.gz	TF	Yes		transcription factor	COG1670
ZNF225	FLAG	Preferred	https://www.encodeproject.org/files/ENCFF317ZCM/@@download/ENCFF317ZCM.bed.gz	TF	Yes		transcription factor	COG3832
ZNF230	FLAG	Preferred	https://www.encodeproject.org/files/ENCFF718FEV/@@download/ENCFF718FEV.bed.gz	TF	Yes		transcription factor	COG3677
ZNF232	FLAG	Preferred	https://www.encodeproject.org/files/ENCFF394XIE/@@download/ENCFF394XIE.bed.gz	TF	Yes		transcription factor	COG3677
ZNF234	FLAG	Preferred	https://www.encodeproject.org/files/ENCFF104XLA/@@download/ENCFF104XLA.bed.gz	TF	Yes		transcription factor	COG0675
ZNF235	FLAG	Preferred	https://www.ncbi.nlm.nih.gov/geo/download/?acc=GSM7503191&format=file&file=GSM7503191%5FZNF235%2DFLAG%5FPreferred%5FLocal%2EnarrowPeak%2Egz	TF	Yes		transcription factor	COG3311
ZNF24		Preferred	https://www.encodeproject.org/files/ENCFF986VHE/@@download/ENCFF986VHE.bed.gz	TF	Yes		transcription factor	COG3677
ZNF24		Non-preferred	https://www.encodeproject.org/files/ENCFF204MSD/@@download/ENCFF204MSD.bed.gz	TF	Yes		transcription factor	COG3677
ZNF25	FLAG	Preferred	https://www.encodeproject.org/files/ENCFF543VDT/@@download/ENCFF543VDT.bed.gz	TF	Yes		transcription factor	COG3677
ZNF251	FLAG	Preferred	https://www.ncbi.nlm.nih.gov/geo/download/?acc=GSM7503195&format=file&file=GSM7503195%5FZNF251%2DFLAG%5FPreferred%5FLocal%2EnarrowPeak%2Egz	TF	Yes		transcription factor	COG3677
ZNF256	FLAG	Preferred	https://www.encodeproject.org/files/ENCFF612NCS/@@download/ENCFF612NCS.bed.gz	TF	Yes		transcription factor	COG3677
ZNF260	FLAG	Preferred	https://www.encodeproject.org/files/ENCFF291TYB/@@download/ENCFF291TYB.bed.gz	TF	Yes		transcription factor	COG1961
ZNF263	FLAG	Preferred	https://www.encodeproject.org/files/ENCFF236FRR/@@download/ENCFF236FRR.bed.gz	TF	Yes		transcription factor	COG3677
ZNF264	FLAG	Preferred	https://www.encodeproject.org/files/ENCFF027ANT/@@download/ENCFF027ANT.bed.gz	TF	Yes		transcription factor	COG3677
ZNF274	FLAG	Preferred	https://www.encodeproject.org/files/ENCFF243RMX/@@download/ENCFF243RMX.bed.gz	TF	Yes		transcription factor	COG3677
ZNF275	FLAG	Preferred	https://www.ncbi.nlm.nih.gov/geo/download/?acc=GSM7503199&format=file&file=GSM7503199%5FZNF275%2DFLAG%5FPreferred%5FLocal%2EnarrowPeak%2Egz	TF	Yes		transcription factor	COG0675
ZNF276	FLAG	Preferred	https://www.encodeproject.org/files/ENCFF234KOS/@@download/ENCFF234KOS.bed.gz	TF	Yes		transcription factor	COG0455
ZNF280B	FLAG	Preferred	https://www.encodeproject.org/files/ENCFF763FLS/@@download/ENCFF763FLS.bed.gz	TF	Yes		transcription factor	COG3677
ZNF280C	FLAG	Preferred	https://www.ncbi.nlm.nih.gov/geo/download/?acc=GSM7503203&format=file&file=GSM7503203%5FZNF280C%2DFLAG%5FPreferred%5FLocal%2EnarrowPeak%2Egz	TF	Yes		transcription factor	COG0484
ZNF280D	FLAG	Preferred	https://www.encodeproject.org/files/ENCFF979JSC/@@download/ENCFF979JSC.bed.gz	TF	Yes		transcription factor	COG1198
ZNF281	FLAG	Preferred	https://www.encodeproject.org/files/ENCFF497XRB/@@download/ENCFF497XRB.bed.gz	TF	Yes		transcription factor	COG3170
ZNF282		Preferred	https://www.encodeproject.org/files/ENCFF637KAI/@@download/ENCFF637KAI.bed.gz	TF	Yes		transcription factor	COG3677
ZNF284	FLAG	Preferred	https://www.ncbi.nlm.nih.gov/geo/download/?acc=GSM7503207&format=file&file=GSM7503207%5FZNF284%2DFLAG%5FPreferred%5FLocal%2EnarrowPeak%2Egz	TF	Yes		transcription factor	COG3677
ZNF296	FLAG	Preferred	https://www.encodeproject.org/files/ENCFF959TJF/@@download/ENCFF959TJF.bed.gz	TF	Yes		transcription factor	COG0484
ZNF3	FLAG	Preferred	https://www.encodeproject.org/files/ENCFF358VSZ/@@download/ENCFF358VSZ.bed.gz	TF	Yes		transcription factor	COG0494
ZNF30	FLAG	Preferred	https://www.encodeproject.org/files/ENCFF391RHE/@@download/ENCFF391RHE.bed.gz	TF	Yes		transcription factor	COG3091
ZNF317	FLAG	Preferred	https://www.encodeproject.org/files/ENCFF051JQT/@@download/ENCFF051JQT.bed.gz	TF	Yes		transcription factor	COG0846
ZNF318	FLAG	Preferred	https://www.encodeproject.org/files/ENCFF206IFJ/@@download/ENCFF206IFJ.bed.gz	TF	Yes		transcription factor	COG3115
ZNF326	FLAG	Preferred	https://www.encodeproject.org/files/ENCFF496AGX/@@download/ENCFF496AGX.bed.gz	TF	Yes		RNA binding protein,transcription factor	COG3951
ZNF329	FLAG	Preferred	https://www.ncbi.nlm.nih.gov/geo/download/?acc=GSM7503211&format=file&file=GSM7503211%5FZNF329%2DFLAG%5FPreferred%5FLocal%2EnarrowPeak%2Egz	TF	Yes		transcription factor	COG3464
ZNF331	FLAG	Preferred	https://www.encodeproject.org/files/ENCFF333ZPM/@@download/ENCFF333ZPM.bed.gz	TF	Yes		transcription factor	COG3677
ZNF333	FLAG	Preferred	https://www.encodeproject.org/files/ENCFF740MCS/@@download/ENCFF740MCS.bed.gz	TF	Yes		transcription factor	COG2442
ZNF334	FLAG	Preferred	https://www.ncbi.nlm.nih.gov/geo/download/?acc=GSM7503215&format=file&file=GSM7503215%5FZNF334%2DFLAG%5FPreferred%5FLocal%2EnarrowPeak%2Egz	TF	Yes		transcription factor	COG3440
ZNF335	FLAG	Preferred	https://www.encodeproject.org/files/ENCFF349JFK/@@download/ENCFF349JFK.bed.gz	TF	Yes		transcription factor	COG1403
ZNF337	FLAG	Preferred	https://www.encodeproject.org/files/ENCFF457DKJ/@@download/ENCFF457DKJ.bed.gz	TF	Yes		transcription factor	COG3677
ZNF33A	FLAG	Preferred	https://www.encodeproject.org/files/ENCFF408VEZ/@@download/ENCFF408VEZ.bed.gz	TF	Yes		transcription factor	COG1961
ZNF33B	FLAG	Preferred	https://www.encodeproject.org/files/ENCFF643NJV/@@download/ENCFF643NJV.bed.gz	TF	Yes		transcription factor	COG1051
ZNF34	FLAG	Preferred	https://www.encodeproject.org/files/ENCFF175VWS/@@download/ENCFF175VWS.bed.gz	TF	Yes		transcription factor	COG3677
ZNF343	FLAG	Preferred	https://www.encodeproject.org/files/ENCFF956GVV/@@download/ENCFF956GVV.bed.gz	TF	Yes		transcription factor	COG3677
ZNF350	FLAG	Preferred	https://www.encodeproject.org/files/ENCFF094QEU/@@download/ENCFF094QEU.bed.gz	TF	Yes		transcription factor	COG3677
ZNF362	FLAG	Preferred	https://www.encodeproject.org/files/ENCFF136MFE/@@download/ENCFF136MFE.bed.gz	TF	Yes		transcription factor	COG3209
ZNF367	FLAG	Preferred	https://www.encodeproject.org/files/ENCFF822NPN/@@download/ENCFF822NPN.bed.gz	TF	Yes		transcription factor	COG3677
ZNF382	FLAG	Preferred	https://www.encodeproject.org/files/ENCFF158ZLL/@@download/ENCFF158ZLL.bed.gz	TF	Yes		transcription factor	COG3677
ZNF383	FLAG	Preferred	https://www.encodeproject.org/files/ENCFF689AMX/@@download/ENCFF689AMX.bed.gz	TF	Yes		transcription factor	COG3677
ZNF384		Preferred	https://www.encodeproject.org/files/ENCFF449KJR/@@download/ENCFF449KJR.bed.gz	TF	Yes		transcription factor	COG1403
ZNF407	FLAG	Preferred	https://www.encodeproject.org/files/ENCFF373JGX/@@download/ENCFF373JGX.bed.gz	TF	Yes		transcription factor	COG3209
ZNF414	FLAG	Preferred	https://www.encodeproject.org/files/ENCFF933JZI/@@download/ENCFF933JZI.bed.gz	TF	Yes		transcription factor	COG1403
ZNF430	FLAG	Preferred	https://www.ncbi.nlm.nih.gov/geo/download/?acc=GSM7503219&format=file&file=GSM7503219%5FZNF430%2DFLAG%5FPreferred%5FLocal%2EnarrowPeak%2Egz	TF	Yes		transcription factor	COG1396
ZNF431	FLAG	Non-preferred	https://www.ncbi.nlm.nih.gov/geo/download/?acc=GSM7503223&format=file&file=GSM7503223%5FZNF431%2DFLAG%5FNon%2Dpreferred%5FLocal%2EnarrowPeak%2Egz	TF	Yes		transcription factor	COG1961
ZNF432	FLAG	Preferred	https://www.encodeproject.org/files/ENCFF046FVA/@@download/ENCFF046FVA.bed.gz	TF	Yes		transcription factor	COG3677
ZNF439	FLAG	Preferred	https://www.ncbi.nlm.nih.gov/geo/download/?acc=GSM7503228&format=file&file=GSM7503228%5FZNF439%2DFLAG%5FPreferred%5FLocal%2EnarrowPeak%2Egz	TF	Yes		transcription factor	COG3677
ZNF44	FLAG	Preferred	https://www.encodeproject.org/files/ENCFF512PIO/@@download/ENCFF512PIO.bed.gz	TF	Yes		transcription factor	COG0286
ZNF441	FLAG	Preferred	https://www.encodeproject.org/files/ENCFF995IVE/@@download/ENCFF995IVE.bed.gz	TF	Yes		transcription factor	COG2814
ZNF446	FLAG	Preferred	https://www.encodeproject.org/files/ENCFF866GKQ/@@download/ENCFF866GKQ.bed.gz	TF	Yes		transcription factor	COG3677
ZNF45	FLAG	Preferred	https://www.ncbi.nlm.nih.gov/geo/download/?acc=GSM7503232&format=file&file=GSM7503232%5FZNF45%2DFLAG%5FPreferred%5FLocal%2EnarrowPeak%2Egz	TF	Yes		transcription factor	COG3677
ZNF451	FLAG	Preferred	https://www.encodeproject.org/files/ENCFF655ABJ/@@download/ENCFF655ABJ.bed.gz	TF	Yes		transcription factor	COG0582
ZNF460	FLAG	Preferred	https://www.encodeproject.org/files/ENCFF362HXG/@@download/ENCFF362HXG.bed.gz	TF	Yes		transcription factor	COG3677
ZNF48	FLAG	Preferred	https://www.encodeproject.org/files/ENCFF833GIB/@@download/ENCFF833GIB.bed.gz	TF	Yes		transcription factor	COG3677
ZNF483	FLAG	Preferred	https://www.encodeproject.org/files/ENCFF727IPR/@@download/ENCFF727IPR.bed.gz	TF	Yes		transcription factor	COG3012
ZNF484	FLAG	Preferred	https://www.encodeproject.org/files/ENCFF342SJZ/@@download/ENCFF342SJZ.bed.gz	TF	Yes		transcription factor	COG3677
ZNF485	FLAG	Preferred	https://www.encodeproject.org/files/ENCFF497ADN/@@download/ENCFF497ADN.bed.gz	TF	Yes		transcription factor	COG0675
ZNF490	FLAG	Preferred	https://www.encodeproject.org/files/ENCFF088FSM/@@download/ENCFF088FSM.bed.gz	TF	Yes		transcription factor	COG3791
ZNF501	FLAG	Preferred	https://www.encodeproject.org/files/ENCFF355NOU/@@download/ENCFF355NOU.bed.gz	TF	Yes		transcription factor	COG3677
ZNF503	FLAG	Preferred	https://www.encodeproject.org/files/ENCFF965ADE/@@download/ENCFF965ADE.bed.gz	TF	Yes		transcription factor	COG1075
ZNF510	FLAG	Preferred	https://www.encodeproject.org/files/ENCFF573VMV/@@download/ENCFF573VMV.bed.gz	TF	Yes		transcription factor	COG1403
ZNF511	FLAG	Preferred	https://www.encodeproject.org/files/ENCFF612MNU/@@download/ENCFF612MNU.bed.gz	TF	Yes		transcription factor	COG1403
ZNF512	FLAG	Preferred	https://www.encodeproject.org/files/ENCFF860GTX/@@download/ENCFF860GTX.bed.gz	TF	Yes		transcription factor	COG1403
ZNF512B	FLAG	Preferred	https://www.encodeproject.org/files/ENCFF898BBA/@@download/ENCFF898BBA.bed.gz	TF	Yes		transcription factor	COG1403
ZNF513	FLAG	Preferred	https://www.encodeproject.org/files/ENCFF422MYG/@@download/ENCFF422MYG.bed.gz	TF	Yes		transcription factor	COG3464
ZNF526	FLAG	Preferred	https://www.encodeproject.org/files/ENCFF556HNR/@@download/ENCFF556HNR.bed.gz	TF	Yes		transcription factor	COG0484
ZNF528	FLAG	Preferred	https://www.ncbi.nlm.nih.gov/geo/download/?acc=GSM7503236&format=file&file=GSM7503236%5FZNF528%2DFLAG%5FPreferred%5FLocal%2EnarrowPeak%2Egz	TF	Yes		transcription factor	COG4636
ZNF529	FLAG	Preferred	https://www.ncbi.nlm.nih.gov/geo/download/?acc=GSM7503240&format=file&file=GSM7503240%5FZNF529%2DFLAG%5FPreferred%5FLocal%2EnarrowPeak%2Egz	TF	Yes		transcription factor	COG3677
ZNF530	FLAG	Preferred	https://www.encodeproject.org/files/ENCFF816SRV/@@download/ENCFF816SRV.bed.gz	TF	Yes		transcription factor	COG2814
ZNF543	FLAG	Preferred	https://www.encodeproject.org/files/ENCFF882RAQ/@@download/ENCFF882RAQ.bed.gz	TF	Yes		transcription factor	COG1162
ZNF544	FLAG	Preferred	https://www.ncbi.nlm.nih.gov/geo/download/?acc=GSM7503244&format=file&file=GSM7503244%5FZNF544%2DFLAG%5FPreferred%5FLocal%2EnarrowPeak%2Egz	TF	Yes		transcription factor	COG0789
ZNF546	FLAG	Preferred	https://www.ncbi.nlm.nih.gov/geo/download/?acc=GSM7503248&format=file&file=GSM7503248%5FZNF546%2DFLAG%5FPreferred%5FLocal%2EnarrowPeak%2Egz	TF	Yes		transcription factor	COG3157
ZNF547	FLAG	Preferred	https://www.encodeproject.org/files/ENCFF907JYN/@@download/ENCFF907JYN.bed.gz	TF	Yes		transcription factor	COG2814
ZNF548	FLAG	Preferred	https://www.encodeproject.org/files/ENCFF920CNM/@@download/ENCFF920CNM.bed.gz	TF	Yes		transcription factor	COG3677
ZNF549	FLAG	Preferred	https://www.encodeproject.org/files/ENCFF430MJE/@@download/ENCFF430MJE.bed.gz	TF	Yes		transcription factor	COG3677
ZNF550	FLAG	Preferred	https://www.encodeproject.org/files/ENCFF731WIR/@@download/ENCFF731WIR.bed.gz	TF	Yes		transcription factor	COG0662
ZNF552	FLAG	Preferred	https://www.ncbi.nlm.nih.gov/geo/download/?acc=GSM7503251&format=file&file=GSM7503251%5FZNF552%2DFLAG%5FPreferred%5FLocal%2EnarrowPeak%2Egz	TF	Yes		transcription factor	COG3311
ZNF556	FLAG	Preferred	https://www.encodeproject.org/files/ENCFF922AIE/@@download/ENCFF922AIE.bed.gz	TF	Yes		transcription factor	COG2318
ZNF557	FLAG	Preferred	https://www.encodeproject.org/files/ENCFF259TEE/@@download/ENCFF259TEE.bed.gz	TF	Yes		transcription factor	COG3677
ZNF558	FLAG	Preferred	https://www.ncbi.nlm.nih.gov/geo/download/?acc=GSM7503253&format=file&file=GSM7503253%5FZNF558%2DFLAG%5FPreferred%5FLocal%2EnarrowPeak%2Egz	TF	Yes		transcription factor	COG3677
ZNF559	FLAG	Preferred	https://www.ncbi.nlm.nih.gov/geo/download/?acc=GSM7503255&format=file&file=GSM7503255%5FZNF559%2DFLAG%5FPreferred%5FLocal%2EnarrowPeak%2Egz	TF	Yes		transcription factor	COG3677
ZNF569	FLAG	Preferred	https://www.encodeproject.org/files/ENCFF070OZC/@@download/ENCFF070OZC.bed.gz	TF	Yes		transcription factor	COG1961
ZNF570	FLAG	Preferred	https://www.encodeproject.org/files/ENCFF856VYT/@@download/ENCFF856VYT.bed.gz	TF	Yes		transcription factor	COG2814
ZNF571	FLAG	Preferred	https://www.ncbi.nlm.nih.gov/geo/download/?acc=GSM7503257&format=file&file=GSM7503257%5FZNF571%2DFLAG%5FPreferred%5FLocal%2EnarrowPeak%2Egz	TF	Yes		transcription factor	COG3157
ZNF572	FLAG	Preferred	https://www.encodeproject.org/files/ENCFF637PFM/@@download/ENCFF637PFM.bed.gz	TF	Yes		transcription factor	COG3677
ZNF574	FLAG	Preferred	https://www.encodeproject.org/files/ENCFF165QEH/@@download/ENCFF165QEH.bed.gz	TF	Yes		transcription factor	COG1403
ZNF576	FLAG	Preferred	https://www.encodeproject.org/files/ENCFF062ELQ/@@download/ENCFF062ELQ.bed.gz	TF	Yes		transcription factor	COG1403
ZNF577	FLAG	Preferred	https://www.encodeproject.org/files/ENCFF595JDU/@@download/ENCFF595JDU.bed.gz	TF	Yes		transcription factor	COG4405
ZNF580	FLAG	Preferred	https://www.encodeproject.org/files/ENCFF408BQV/@@download/ENCFF408BQV.bed.gz	TF	Yes		transcription factor	COG3677
ZNF593	FLAG	Preferred	https://www.ncbi.nlm.nih.gov/geo/download/?acc=GSM7503258&format=file&file=GSM7503258%5FZNF593%2DFLAG%5FPreferred%5FLocal%2EnarrowPeak%2Egz	Other	No		transcription factor	COG1734
ZNF597	FLAG	Preferred	https://www.encodeproject.org/files/ENCFF396EJG/@@download/ENCFF396EJG.bed.gz	TF	Yes		transcription factor	COG3677
ZNF598	FLAG	Preferred	https://www.encodeproject.org/files/ENCFF921QZP/@@download/ENCFF921QZP.bed.gz	TF	Yes		RNA binding protein,transcription factor	COG0515
ZNF607	FLAG	Preferred	https://www.encodeproject.org/files/ENCFF701MWB/@@download/ENCFF701MWB.bed.gz	TF	Yes		transcription factor	COG3677
ZNF608	FLAG	Preferred	https://www.encodeproject.org/files/ENCFF650JSG/@@download/ENCFF650JSG.bed.gz	TF	Yes		transcription factor	COG3409
ZNF609	FLAG	Preferred	https://www.encodeproject.org/files/ENCFF388MQU/@@download/ENCFF388MQU.bed.gz	TF	Yes		transcription factor	COG0515
ZNF614	FLAG	Preferred	https://www.encodeproject.org/files/ENCFF941XGS/@@download/ENCFF941XGS.bed.gz	TF	Yes		transcription factor	COG0177
ZNF615	FLAG	Preferred	https://www.encodeproject.org/files/ENCFF397QBT/@@download/ENCFF397QBT.bed.gz	TF	Yes		transcription factor	COG3677
ZNF616	FLAG	Preferred	https://www.encodeproject.org/files/ENCFF816JWX/@@download/ENCFF816JWX.bed.gz	TF	Yes		transcription factor	COG3677
ZNF619	FLAG	Preferred	https://www.encodeproject.org/files/ENCFF328OBA/@@download/ENCFF328OBA.bed.gz	TF	Yes		transcription factor	COG0247
ZNF629	FLAG	Preferred	https://www.encodeproject.org/files/ENCFF034RYJ/@@download/ENCFF034RYJ.bed.gz	TF	Yes		transcription factor	COG0358
ZNF639	FLAG	Preferred	https://www.encodeproject.org/files/ENCFF070QDA/@@download/ENCFF070QDA.bed.gz	TF	Yes		transcription factor	COG1198
ZNF644	FLAG	Preferred	https://www.encodeproject.org/files/ENCFF203RMY/@@download/ENCFF203RMY.bed.gz	TF	Yes		transcription factor	COG1361
ZNF646	FLAG	Preferred	https://www.ncbi.nlm.nih.gov/geo/download/?acc=GSM7503260&format=file&file=GSM7503260%5FZNF646%2DFLAG%5FPreferred%5FLocal%2EnarrowPeak%2Egz	TF	Yes		transcription factor	COG0484
ZNF652	FLAG	Preferred	https://www.encodeproject.org/files/ENCFF054CBG/@@download/ENCFF054CBG.bed.gz	TF	Yes		transcription factor	COG1403
ZNF660	FLAG	Preferred	https://www.encodeproject.org/files/ENCFF732OUU/@@download/ENCFF732OUU.bed.gz	TF	Yes		transcription factor	COG2801
ZNF669	FLAG	Preferred	https://www.ncbi.nlm.nih.gov/geo/download/?acc=GSM7503261&format=file&file=GSM7503261%5FZNF669%2DFLAG%5FPreferred%5FLocal%2EnarrowPeak%2Egz	TF	Yes		transcription factor	COG3677
ZNF674	FLAG	Preferred	https://www.encodeproject.org/files/ENCFF252BNC/@@download/ENCFF252BNC.bed.gz	TF	Yes		transcription factor	COG0675
ZNF678	FLAG	Preferred	https://www.encodeproject.org/files/ENCFF418FOX/@@download/ENCFF418FOX.bed.gz	TF	Yes		transcription factor	COG3677
ZNF687	FLAG	Preferred	https://www.encodeproject.org/files/ENCFF740MUD/@@download/ENCFF740MUD.bed.gz	TF	Yes		transcription factor	COG1396
ZNF688	FLAG	Preferred	https://www.ncbi.nlm.nih.gov/geo/download/?acc=GSM7503263&format=file&file=GSM7503263%5FZNF688%2DFLAG%5FPreferred%5FLocal%2EnarrowPeak%2Egz	TF	Yes		transcription factor	COG4974
ZNF691	FLAG	Preferred	https://www.encodeproject.org/files/ENCFF199ILE/@@download/ENCFF199ILE.bed.gz	TF	Yes		transcription factor	COG3464
ZNF697	FLAG	Preferred	https://www.encodeproject.org/files/ENCFF385UIF/@@download/ENCFF385UIF.bed.gz	TF	Yes		transcription factor	COG0476
ZNF7	FLAG	Preferred	https://www.encodeproject.org/files/ENCFF461TFR/@@download/ENCFF461TFR.bed.gz	TF	Yes		transcription factor	COG0515
ZNF701	FLAG	Preferred	https://www.ncbi.nlm.nih.gov/geo/download/?acc=GSM7503264&format=file&file=GSM7503264%5FZNF701%2DFLAG%5FPreferred%5FLocal%2EnarrowPeak%2Egz	TF	Yes		transcription factor	COG3677
ZNF703	FLAG	Preferred	https://www.encodeproject.org/files/ENCFF598AOP/@@download/ENCFF598AOP.bed.gz	TF	Yes		transcription factor	COG0484
ZNF704	FLAG	Preferred	https://www.ncbi.nlm.nih.gov/geo/download/?acc=GSM7503266&format=file&file=GSM7503266%5FZNF704%2DFLAG%5FPreferred%5FLocal%2EnarrowPeak%2Egz	TF	Yes		transcription factor	COG3039
ZNF707	FLAG	Preferred	https://www.encodeproject.org/files/ENCFF306CIS/@@download/ENCFF306CIS.bed.gz	TF	Yes		transcription factor	COG3311
ZNF709	FLAG	Preferred	https://www.encodeproject.org/files/ENCFF311UDM/@@download/ENCFF311UDM.bed.gz	TF	Yes		transcription factor	COG0675
ZNF710	FLAG	Preferred	https://www.encodeproject.org/files/ENCFF443DLW/@@download/ENCFF443DLW.bed.gz	TF	Yes		transcription factor	COG1198
ZNF713	FLAG	Preferred	https://www.encodeproject.org/files/ENCFF124XNU/@@download/ENCFF124XNU.bed.gz	TF	Yes		transcription factor	COG1403
KRBOX5	FLAG	Preferred	https://www.encodeproject.org/files/ENCFF663OMI/@@download/ENCFF663OMI.bed.gz	Other	No		transcription factor	COG0446
ZNF737	FLAG	Preferred	https://www.encodeproject.org/files/ENCFF241CGC/@@download/ENCFF241CGC.bed.gz	TF	Yes		transcription factor	COG3464
ZNF74	FLAG	Preferred	https://www.ncbi.nlm.nih.gov/geo/download/?acc=GSM7503267&format=file&file=GSM7503267%5FZNF74%2DFLAG%5FPreferred%5FLocal%2EnarrowPeak%2Egz	TF	Yes		transcription factor	COG3677
ZNF740	FLAG	Preferred	https://www.encodeproject.org/files/ENCFF455XDQ/@@download/ENCFF455XDQ.bed.gz	TF	Yes		transcription factor	COG0675
ZNF746	FLAG	Preferred	https://www.ncbi.nlm.nih.gov/geo/download/?acc=GSM7503269&format=file&file=GSM7503269%5FZNF746%2DFLAG%5FPreferred%5FLocal%2EnarrowPeak%2Egz	TF	Yes		transcription factor	COG1198
ZNF747	FLAG	Preferred	https://www.ncbi.nlm.nih.gov/geo/download/?acc=GSM7503271&format=file&file=GSM7503271%5FZNF747%2DFLAG%5FPreferred%5FLocal%2EnarrowPeak%2Egz	TF	Yes		transcription factor	COG3415
ZNF75D	FLAG	Preferred	https://www.ncbi.nlm.nih.gov/geo/download/?acc=GSM7503272&format=file&file=GSM7503272%5FZNF75D%2DFLAG%5FPreferred%5FLocal%2EnarrowPeak%2Egz	TF	Yes		transcription factor	COG3677
ZNF761	FLAG	Preferred	https://www.encodeproject.org/files/ENCFF670IOD/@@download/ENCFF670IOD.bed.gz	TF	Yes		transcription factor	COG1484
ZNF766	FLAG	Preferred	https://www.encodeproject.org/files/ENCFF612XIV/@@download/ENCFF612XIV.bed.gz	TF	Yes		transcription factor	COG1592
ZNF768	FLAG	Preferred	https://www.encodeproject.org/files/ENCFF654RZY/@@download/ENCFF654RZY.bed.gz	TF	Yes		transcription factor	COG3599
ZNF770	FLAG	Preferred	https://www.encodeproject.org/files/ENCFF588FNM/@@download/ENCFF588FNM.bed.gz	TF	Yes		transcription factor	COG1403
ZNF772	FLAG	Preferred	https://www.encodeproject.org/files/ENCFF432AEF/@@download/ENCFF432AEF.bed.gz	TF	Yes		transcription factor	COG0477
ZNF773	FLAG	Preferred	https://www.encodeproject.org/files/ENCFF932NJV/@@download/ENCFF932NJV.bed.gz	TF	Yes		transcription factor	COG0789
ZNF775	FLAG	Preferred	https://www.encodeproject.org/files/ENCFF714LPZ/@@download/ENCFF714LPZ.bed.gz	TF	Yes		transcription factor	COG3791
ZNF776	FLAG	Preferred	https://www.encodeproject.org/files/ENCFF883RGN/@@download/ENCFF883RGN.bed.gz	TF	Yes		transcription factor	COG3440
ZNF777	FLAG	Preferred	https://www.encodeproject.org/files/ENCFF428UWW/@@download/ENCFF428UWW.bed.gz	TF	Yes		transcription factor	COG1570
ZNF778	FLAG	Preferred	https://www.encodeproject.org/files/ENCFF996HUI/@@download/ENCFF996HUI.bed.gz	TF	Yes		transcription factor	COG3209
ZNF781	FLAG	Preferred	https://www.encodeproject.org/files/ENCFF193YIR/@@download/ENCFF193YIR.bed.gz	TF	Yes		transcription factor	COG3677
ZNF782	FLAG	Preferred	https://www.encodeproject.org/files/ENCFF042SYC/@@download/ENCFF042SYC.bed.gz	TF	Yes		transcription factor	COG0675
ZNF783	FLAG	Preferred	https://www.ncbi.nlm.nih.gov/geo/download/?acc=GSM7503274&format=file&file=GSM7503274%5FZNF783%2DFLAG%5FPreferred%5FLocal%2EnarrowPeak%2Egz	TF	Yes		transcription factor	COG3677
ZNF784	FLAG	Preferred	https://www.encodeproject.org/files/ENCFF537LZR/@@download/ENCFF537LZR.bed.gz	TF	Yes		transcription factor	COG2132
ZNF786	FLAG	Preferred	https://www.encodeproject.org/files/ENCFF458FBS/@@download/ENCFF458FBS.bed.gz	TF	Yes		transcription factor	COG1403
ZNF788P	FLAG	Preferred	https://www.encodeproject.org/files/ENCFF704BJL/@@download/ENCFF704BJL.bed.gz	TF	Yes		transcription factor
ZNF790	FLAG	Preferred	https://www.ncbi.nlm.nih.gov/geo/download/?acc=GSM7503275&format=file&file=GSM7503275%5FZNF790%2DFLAG%5FPreferred%5FLocal%2EnarrowPeak%2Egz	TF	Yes		transcription factor	COG3677
ZNF792	FLAG	Preferred	https://www.encodeproject.org/files/ENCFF669RYM/@@download/ENCFF669RYM.bed.gz	TF	Yes		transcription factor	COG0515
ZNF800	FLAG	Preferred	https://www.encodeproject.org/files/ENCFF126HMH/@@download/ENCFF126HMH.bed.gz	TF	Yes		RNA binding protein,transcription factor	COG0551
ZNF816	FLAG	Preferred	https://www.ncbi.nlm.nih.gov/geo/download/?acc=GSM7503277&format=file&file=GSM7503277%5FZNF816%2DFLAG%5FPreferred%5FLocal%2EnarrowPeak%2Egz	TF	Yes		transcription factor	COG0675
ZNF827	FLAG	Preferred	https://www.ncbi.nlm.nih.gov/geo/download/?acc=GSM7503278&format=file&file=GSM7503278%5FZNF827%2DFLAG%5FPreferred%5FLocal%2EnarrowPeak%2Egz	TF	Yes		transcription factor	COG1413
ZNF83	FLAG	Preferred	https://www.encodeproject.org/files/ENCFF007OPT/@@download/ENCFF007OPT.bed.gz	TF	Yes		transcription factor	COG0789
ZNF839	FLAG	Preferred	https://www.encodeproject.org/files/ENCFF395CSH/@@download/ENCFF395CSH.bed.gz	Other	No		transcription factor	COG1403
ZNF85	FLAG	Preferred	https://www.ncbi.nlm.nih.gov/geo/download/?acc=GSM7503280&format=file&file=GSM7503280%5FZNF85%2DFLAG%5FPreferred%5FLocal%2EnarrowPeak%2Egz	TF	Yes		transcription factor	COG1484
ZNF850	FLAG	Preferred	https://www.ncbi.nlm.nih.gov/geo/download/?acc=GSM7503281&format=file&file=GSM7503281%5FZNF850%2DFLAG%5FPreferred%5FLocal%2EnarrowPeak%2Egz	TF	Yes			COG1475
ZNF853	FLAG	Preferred	https://www.ncbi.nlm.nih.gov/geo/download/?acc=GSM7503283&format=file&file=GSM7503283%5FZNF853%2DFLAG%5FPreferred%5FLocal%2EnarrowPeak%2Egz	TF	Yes		transcription factor	COG1579
ZNF865	FLAG	Preferred	https://www.ncbi.nlm.nih.gov/geo/download/?acc=GSM7503285&format=file&file=GSM7503285%5FZNF865%2DFLAG%5FPreferred%5FLocal%2EnarrowPeak%2Egz	TF	Yes			COG1403
ZNF879	FLAG	Preferred	https://www.ncbi.nlm.nih.gov/geo/download/?acc=GSM7503287&format=file&file=GSM7503287%5FZNF879%2DFLAG%5FPreferred%5FLocal%2EnarrowPeak%2Egz	TF	Yes		transcription factor	COG3677
ZNF883	FLAG	Preferred	https://www.encodeproject.org/files/ENCFF492YLV/@@download/ENCFF492YLV.bed.gz	TF	Yes		transcription factor	COG3677
ZNF891	FLAG	Preferred	https://www.encodeproject.org/files/ENCFF876YSX/@@download/ENCFF876YSX.bed.gz	TF	Yes		transcription factor	COG3677
ZSCAN12	FLAG	Preferred	https://www.ncbi.nlm.nih.gov/geo/download/?acc=GSM7503288&format=file&file=GSM7503288%5FZSCAN12%2DFLAG%5FPreferred%5FLocal%2EnarrowPeak%2Egz	TF	Yes		transcription factor	COG0358
ZSCAN20	FLAG	Preferred	https://www.encodeproject.org/files/ENCFF038DPK/@@download/ENCFF038DPK.bed.gz	TF	Yes		transcription factor	COG5525
ZSCAN22	FLAG	Preferred	https://www.encodeproject.org/files/ENCFF120MEJ/@@download/ENCFF120MEJ.bed.gz	TF	Yes		transcription factor	COG3677
ZSCAN25	FLAG	Preferred	https://www.ncbi.nlm.nih.gov/geo/download/?acc=GSM7503289&format=file&file=GSM7503289%5FZSCAN25%2DFLAG%5FPreferred%5FLocal%2EnarrowPeak%2Egz	TF	Yes		transcription factor	COG1773
ZSCAN29	FLAG	Preferred	https://www.encodeproject.org/files/ENCFF896PGF/@@download/ENCFF896PGF.bed.gz	TF	Yes		transcription factor	COG0675
ZSCAN30	FLAG	Preferred	https://www.encodeproject.org/files/ENCFF293DBX/@@download/ENCFF293DBX.bed.gz	TF	Yes		transcription factor	COG3012
ZSCAN31	FLAG	Preferred	https://www.encodeproject.org/files/ENCFF560APA/@@download/ENCFF560APA.bed.gz	TF	Yes		transcription factor	COG3464
ZSCAN9	FLAG	Preferred	https://www.encodeproject.org/files/ENCFF302EGM/@@download/ENCFF302EGM.bed.gz	TF	Yes		transcription factor	COG2963
ZUP1	FLAG	Preferred	https://www.ncbi.nlm.nih.gov/geo/download/?acc=GSM7503290&format=file&file=GSM7503290%5FZUFSP%2DFLAG%5FPreferred%5FLocal%2EnarrowPeak%2Egz	TF	Yes		transcription factor
ZXDC	FLAG	Preferred	https://www.encodeproject.org/files/ENCFF623NDC/@@download/ENCFF623NDC.bed.gz	TF	Yes		transcription factor	COG1361
ZZZ3	FLAG	Non-preferred	https://www.ncbi.nlm.nih.gov/geo/download/?acc=GSM7503292&format=file&file=GSM7503292%5FZZZ3%2DFLAG%5FNon%2Dpreferred%5FLocal%2EnarrowPeak%2Egz	TF	Yes		transcription factor	COG1403
ZZZ3	FLAG	Preferred	https://www.encodeproject.org/files/ENCFF117XPT/@@download/ENCFF117XPT.bed.gz	TF	Yes		transcription factor	COG1403

## Sheet: Supplemental Table 2
Supplemental Table 2. Chi-squared p-values associated with Figure 1A and Supplemental Figure 2
state	pvalue
PLS	1.96577e-297
pELS	0
dELS	8.77883e-124
CA-H3K4me3	6.92104e-34
CA-CTCF	2.77652e-29
CA-TF	6.60889e-10
TF	0.136052
CA	0.000000000000000000000000000000000000000000000000000000000000000000000000000000000000000000000000000000000000000000000000000000000000000000000000000000000000000000000000000000000000000000000000000000000000000000000000000000000000000000000000000000000000000000000000000000000000000000000000000000000000000000000000067559616998128

## Sheet: Supplemental Table 3
Supplemental Table 3. Chi-squared p-values associated with Supplemental Figure 4
bin	pvalue
"0"	0
"1-10"	0
"11-25"	0.000000000000000000000000000000000000000000000000000000000000000000000000000000000000000000000000000000000000000000000000000000000000000000000000000000000000000000000000000000000000000000000000000000000000000000000000000000000000000000000000000000000000000000000000000000000487521760001453
"26-50"	8.13272e-163
"51-100"	1.76913e-170
"101-200"	2.97258e-237
"201-300"	9.63782e-197
"301-400"	5.15086e-145
"401-500"	1.88413e-60
"501-600"	1.36314e-08
"601+"	0.317311

## Sheet: Supplemental Table 4
Supplemental Table 4. t-test p-values associated with Figure 1B
	Control	Distal	Promoter	tTestpVal	prom_v_control	dis_v_control
"0"	0	1925	11	0.0333946	0.013751	0.00313897
"1-5"	0	13414	159	6.84247e-12	1.24219e-16	4.57577e-06
"6-10"	0	3528	128	4.22924e-10	2.73276e-24	1.66162e-17
"11-20"	0	4149	304	3.50423e-19	4.9618e-47	2.30212e-25
"21-30"	0	2843	371	6.63992e-23	1.67442e-54	1.61499e-30
"31-40"	0	2473	464	3.03021e-34	5.69756e-59	5.21072e-33
"41-50"	0	2046	455	9.49659e-25	2.60222e-58	2.2065e-35
"51-100"	0	7126	2121	3.85935e-89	8.71995e-47	4.77721e-36
"101-200"	0	6357	2477	9.41742e-37	1.03172e-46	6.09583e-41
"201-300"	0	1569	775	8.60855e-06	2.51629e-54	6.92538e-49
"301-400"	0	322	200	0.000125047	9.51362e-62	2.2637e-49
"401+"	0	144	75	7.05425e-20	6.59266e-27	0.0131273
"NegativeControl"	60	0	0	NA	NA	NA
"PositiveControl"	16	0	0	NA	NA	NA

## Sheet: Supplemental Table 5
Supplemental Table 5. t-test p-values associated with Supplemental Figure 5
	Control	Distal	Promoter	tTestpVal	prom_v_control	dis_v_control
"0"	0	4600	7160	4.00877e-74	5.17809e-11	8.57026e-23
"1-5"	0	31279	2045	0.26623	1.74125e-21	4.48487e-21
"6-10"	0	18452	667	8.26144e-10	1.53159e-32	2.60602e-24
"11-20"	0	16974	933	1.64348e-33	2.15549e-49	5.32092e-31
"21-30"	0	9903	997	9.91258e-62	7.92285e-62	5.67123e-35
"31-40"	0	6679	825	4.98305e-64	2.06242e-68	9.17e-39
"41-50"	0	4929	801	5.45169e-71	8.45188e-73	1.57975e-40
"51-100"	0	13951	3215	0	8.99717e-74	6.34831e-45
"101-200"	0	9070	3028	4.01244e-224	2.29738e-78	6.54807e-56
"201-300"	0	2052	828	2.41986e-30	1.60703e-85	1.17664e-67
"301-400"	0	363	218	3.23352e-09	2.87023e-81	3.37879e-54
"401+"	0	74	60	8.54412e-15	9.09172e-23	0.173357
"NegativeControl"	167	0	0	NA	NA	NA
"PositiveControl"	150	0	0	NA	NA	NA

## Sheet: Supplemental Table 6
Supplemental Table 6. t-test p-values associated with Supplemental Figure 7
	Bound cCREs, All Scores for bound DAPs	Nullmatched sequences, All Scores for all DAPs	Unbound cCREs, All Scores for all DAPs	Bound cCREs, Max Scores for bound DAPs	Nullmatched sequences, Max Scores for all DAPs	Unbound cCREs, Max Scores for all DAPs
Bound cCREs, All Scores for bound DAPs	NA	0	0	0	0	0
Nullmatched sequences, All Scores for all DAPs	NA	NA	0	0	0	0
Unbound cCREs, All Scores for all DAPs	NA	NA	NA	0	0	0
Bound cCREs, Max Scores for bound DAPs	NA	NA	NA	NA	1.06353e-08	0
Nullmatched sequences, Max Scores for all DAPs	NA	NA	NA	NA	NA	0
Unbound cCREs, Max Scores for all DAPs	NA	NA	NA	NA	NA	NA

## Sheet: Supplemental Table 7
Supplemental Table 7. Chi-squared p-values associated with Supplemental Figure 9
	observed_num	observed_num_wABC	observed_fraction	control_num	control_num_wABC	control_fraction	pvalue
"1-5"	656547	189	0.00028787	656547	3306	0.00503544	0
"6-10"	32681	182	0.00556899	32681	272	0.00832288	2.77044e-05
"11-20"	20421	376	0.0184124	20421	152	0.00744332	1.54204e-22
"21-30"	9276	462	0.049806	9276	84	0.00905563	2.79623e-60
"31-40"	6030	475	0.0787728	6030	58	0.00961857	7.4314e-76
"41-50"	4286	407	0.0949603	4286	37	0.00863276	2.60461e-72
"51-100"	12065	2286	0.189474	12065	153	0.0126813	0
"101-200"	11180	4542	0.406261	11180	143	0.0127907	0
"201-300"	5944	3416	0.574697	5944	104	0.0174966	0
"301-400"	2904	1696	0.584022	2904	69	0.0237603	0
"401+"	1433	545	0.380321	1433	31	0.0216329	2.26594e-126

## Sheet: Supplemental Table 8
Supplemental Table 8. t-test p-values associated with Figure 1D
NumBound	Nobservations	tTest_v_0_pval
"0"	10	NA
"1-5"	189	0.653436
"6-10"	182	0.167028
"11-20"	376	0.0720643
"21-30"	462	0.0894036
"31-40"	475	0.0364858
"41-50"	407	0.0835749
"51-100"	2286	0.0317847
"101-200"	4542	0.0220029
"201-300"	3416	0.0204356
"301-400"	1696	0.0226385
"401+"	545	0.0137812

## Sheet: Supplemental Table 9
Supplemental Table 9. Summary of binding-expression submodels (see methods). Frac_sig refers to the fraction of submodels in which the factor was significant. Median_estimate is the median estimate of TF effects in submodels.
TF	frac_sig	median_estimate
ZFX	1	1.56545
ZFY	1	1.54298
ASH2L	1	1.46485
ZNF687	1	1.21033
LIN54	1	1.11353
THAP11	1	1.06245
DRAP1	1	1.03924
POU2F1	1	1.03217
ZNF574	1	0.99796
SALL1	1	0.970575
E2F4	1	0.909905
HOXA3	1	0.895608
EGR1	1	0.867343
ARNT	0.0391667	0.860369
ZFP91	1	0.821817
MBD4	0.998421	0.768811
ZNF282	0.0255319	0.749976
HMGA1	0.0446429	0.749702
KMT2B	1	0.739824
ZBTB12	1	0.735376
KMT2A	1	0.712513
ZGPAT	1	0.709041
PHF20	1	0.69037
TFAP4	1	0.689826
MGA	1	0.678753
KDM2A	0.995319	0.627443
MAZ	1	0.626481
SPEN	0.999074	0.582008
E2F8	1	0.581032
TBX2	1	0.579332
PATZ1	1	0.579315
ZNF501	1	0.577809
TFDP2	1	0.576591
MNX1	0.9966	0.573349
ATF4	0.922273	0.567281
GABPA	1	0.567174
NFIC	1	0.521722
ELF1	0.995208	0.491356
KLF16	0.996591	0.468194
GATA4	1	0.464858
MYBL2	1	0.454222
DR1	1	0.448814
ELF3	0.99878	0.437546
MXI1	1	0.421706
ZNF207	0.00243243	0.415091
NFYB	0.995385	0.412177
CEBPZ	0.557879	0.411448
GMEB1	0.999153	0.410417
SRY	0.9998	0.401624
ZNF430	1	0.394861
NFYA	0.995085	0.394606
IRF3	0.890588	0.39447
ATF1	0.968182	0.388785
HNF1B	0.999286	0.385118
NRF1	1	0.382064
SOX6	0.964878	0.375159
NR2C2	0.991667	0.372178
HBP1	1	0.363296
NFYC	0.998049	0.362385
ETV4	1	0.362371
ERF	0.988958	0.35825
KLF6	1	0.338206
ARID3A	1	0.337868
MYC	0.944286	0.33093
HOXA5	1	0.324799
HNF1A	0.995946	0.324242
ZNF10	0.23	0.324201
IRF2	0.999143	0.318783
ZBTB33	0.998056	0.317147
E4F1	0.996818	0.314174
SP5	1	0.312185
TCF7L2	1	0.310673
ZNF384	1	0.302919
HES4	0.995577	0.298724
KDM5B	0.96381	0.2955
PHF21A	0.981087	0.290154
SP2	0.9784	0.282662
IKZF5	0.98	0.282192
ELF4	0.992632	0.272345
MXD4	0.977429	0.272081
ZNF142	0.995116	0.270872
SKI	0.985714	0.268097
MXD1	0.987442	0.267291
ZNF558	1	0.266079
ZNF701	0.947949	0.263844
CREB1	0.862647	0.262058
RORA	0.00707317	0.261093
TGIF2	0.989048	0.259889
FOXA2	0.996585	0.259399
ZBTB7A	0.999722	0.258931
ZBTB7B	0.912326	0.258009
ZNF18	1	0.251229
FOXA3	0.945	0.250172
BMAL1	0.991569	0.24883
TFDP1	0.910238	0.247722
MAFF	0.792368	0.246116
TCF7	0.806316	0.24304
ZSCAN31	0.973125	0.242574
SALL2	0.881489	0.242438
CEBPA	0.992273	0.241415
E2F1	0.934667	0.241087
CEBPG	0.9975	0.239514
HMGN3	0.00113636	0.238032
LCORL	0.938684	0.237703
ONECUT1	0.99975	0.237457
ZNF816	0.994857	0.23724
ZNF407	0.875455	0.235935
ZNF891	0.9825	0.235496
ARID5B	0.9674	0.233495
ZNF329	0.992647	0.233092
NFE2L2	0.0495238	0.232316
GATAD2A	0.993158	0.231813
SMAD4	0.912609	0.231567
ISL2	0.890952	0.23029
ZNF350	0.8282	0.229528
ZHX2	0.832609	0.228384
MXD3	0.949744	0.228067
ZBTB38	0.955686	0.226059
SP1	0.35	0.22084
RFX5	0.931282	0.220259
CEBPB	0.837213	0.218557
NAIF1	0.990682	0.218227
MAX	0.95475	0.215443
ZNF543	0.93	0.214923
MAFK	0.815	0.214552
ZNF460	0.802439	0.213033
KLF12	0.872353	0.211893
ZNF331	0.846842	0.210895
ZNF446	0.965	0.206676
GLYR1	0.695111	0.205873
NR2F2	0.694048	0.205567
ZBTB40	0.653111	0.205507
USF1	0.911707	0.203533
SNAI1	0.975	0.201883
ZNF746	0.98	0.200159
ZFP82	0.984839	0.200122
HLF	0.905682	0.199835
FOXC1	0.741463	0.195813
ZNF317	0.935366	0.194274
MEIS2	0.768958	0.194165
NCOA2	0.891429	0.193845
ZNF143	0.694038	0.18886
ZNF414	0.963696	0.188089
LCOR	0.824348	0.187862
ZNF709	0.776	0.1875
ZSCAN30	0.918627	0.187376
NKX3_1	0.936	0.187303
ZNF597	0.00510204	0.187238
FOXK2	0.763415	0.186918
FOSL2	0.824146	0.185932
ZBTB14	0.830222	0.185449
USF2	0.773673	0.184976
ZNF770	0.91619	0.184107
THAP9	0.661957	0.182385
ATF7	0.61375	0.182259
ZNF740	0.929189	0.181957
ZNF783	0.00647059	0.180342
ZNF777	0.812857	0.179999
ZFP62	0.0128	0.178703
ETV5	0.640455	0.177839
PBX2	0.513542	0.177787
SNAPC4	0.949	0.177006
ZNF608	0.879545	0.175945
ZSCAN9	0.906842	0.175868
MAFG	0.00675	0.175847
RARA	0.891	0.172673
ZNF180	0.164783	0.172667
PLSCR1	0.0252632	0.170829
FOXP4	0.87439	0.1707
ZNF48	0.716818	0.169965
ZNF570	0.109783	0.169575
RARG	0.410851	0.169501
PITX1	0.732571	0.169136
ZNF263	0.83575	0.167313
FOXK1	0.353023	0.166788
ZNF747	0.795116	0.165078
GFI1	0.9	0.164764
ZNF772	0.377442	0.164452
E2F5	0.879744	0.163921
ZNF281	0.88575	0.161613
ZNF529	0.883636	0.160863
HNF4A	0.929268	0.16013
ZNF571	0.770455	0.159893
ZNF546	0.743061	0.159424
ZBTB25	0.620714	0.1587
ZNF24	0.180571	0.158585
HSF4	0.658049	0.158572
JRK	0.722333	0.158091
SRF	0.519091	0.156924
HOMEZ	0.6626	0.156918
ZKSCAN1	0.232037	0.156885
JUND	0.388958	0.156675
MNT	0.73875	0.156358
STAT5A	0.527174	0.156164
HMG20A	0.147931	0.156114
ZNF697	0.599	0.155088
SIX5	0.787907	0.155005
ZIM2	0.755556	0.154529
CEBPD	0.718723	0.154122
ZNF7	0.00243902	0.154011
ZNF790	0.801892	0.153729
BAZ2A	0.6795	0.152681
ZNF784	0.870238	0.152653
STAT6	0.458039	0.15265
TEAD4	0.106739	0.152274
HINFP	0.876429	0.152265
ATF2	0.310333	0.151314
ZNF441	0.585435	0.149984
ZNF20	0.449231	0.149846
GMEB2	0.591026	0.149662
ZNF615	0.4535	0.149499
PRDM15	0.683478	0.147989
ZNF776	0.649111	0.147592
FOXM1	0.0958491	0.147524
XBP1	0.147273	0.147357
ZSCAN25	0.774898	0.146911
NFIL3	0.667692	0.14661
ONECUT2	0.45325	0.146399
ZBTB8A	0.0679592	0.145724
ZNF547	0.424118	0.145498
SIX1	0.142051	0.144977
RXRB	0.497619	0.144775
SOX13	0.422667	0.144635
ZNF883	0.697692	0.144145
TEAD1	0.562895	0.143555
ZBTB43	0.563659	0.143242
SMAD3	0.574043	0.142451
TIGD6	0.665789	0.142228
ZNF33A	0.0986486	0.1422
ZNF138	0.690541	0.141637
ATF3	0.18617	0.140943
NRL	0.598372	0.140435
ZNF74	0.580638	0.140334
ZNF639	0.402105	0.140326
ZNF737	0.0375	0.140191
ZNF544	0.458163	0.140148
NFE2L1	0.00612903	0.139986
HIVEP1	0.381892	0.139888
ZKSCAN5	0.0725641	0.139881
ZNF761	0.570962	0.139843
ZNF788P	0.322766	0.139584
HES6	0.669773	0.13943
ZNF674	0.470784	0.138231
MLXIP	0.265641	0.136446
ZNF503	0.513617	0.136064
ZNF580	0.346667	0.13601
ZNF284	0.0474419	0.135866
ZNF343	0.495965	0.13586
ZXDC	0.430465	0.134639
ZNF483	0.525	0.134562
ZNF607	0.2984	0.133457
ZSCAN20	0.255455	0.133382
ZSCAN29	0.652	0.133034
ZNF792	0.176415	0.132763
ZBTB10	0.478333	0.132473
ZNF274	0.397838	0.13076
BCL6	0.2588	0.130655
TRAFD1	0.00875	0.130136
PEG3	0.155714	0.130022
ZNF513	0.00682927	0.130001
ZNF850	0.448235	0.129407
IRF5	0.211111	0.12897
ATF6	0.0751429	0.128963
MIXL1	0.190645	0.128952
TEF	0.174889	0.128764
ZNF710	0.264634	0.12834
NR5A1	0.324103	0.128056
ZNF528	0.542143	0.127995
ZNF775	0.0173333	0.127724
ZNF235	0.484091	0.127697
ELK3	0.292045	0.127514
TFE3	0.402619	0.12732
ZNF768	0.4115	0.12727
ZNF362	0.183056	0.127021
TP53	0.118235	0.12684
PBX3	0.100392	0.126254
EEA1	0.330566	0.125535
ZC3H8	0.402857	0.125529
MEF2D	0.420625	0.124884
BHLHE40	0.428182	0.12484
ZNF234	0.411373	0.124814
ZNF34	0.408571	0.124785
ZNF778	0.0175	0.123646
ZNF224	0.350357	0.123642
ZNF550	0.0118868	0.123484
ZNF383	0.00851064	0.123161
ZNF704	0.259091	0.12309
ISX	0.183784	0.123086
CENPBD1P	0.0227027	0.122695
ZNF875	0.386842	0.122245
DLX6	0.354318	0.121879
ZNF230	0.209804	0.121867
ZBED4	0.152222	0.121859
NFAT5	0.125758	0.121667
ZIK1	0.414255	0.121504
ZGLP1	0.0283784	0.120799
ZNF121	0.235455	0.120342
ZBTB42	0.0857143	0.120175
PRDM10	0.422093	0.120011
ZFHX3	0.0119444	0.119882
ZNF280D	0.280889	0.119761
ZNF691	0.0904545	0.11955
ZFAT	0.0103922	0.119549
ZNF160	0.246053	0.119521
ZNF510	0.2275	0.119454
ZNF264	0.178511	0.119401
KLF11	0.193103	0.119053
HSF2	0.00428571	0.118915
ZNF296	0.0557143	0.118905
THRA	0.15975	0.118592
ZNF451	0.132857	0.118463
TEAD3	0.213256	0.11843
ZNF707	0.0336	0.117489
GATA2	0.0329787	0.117351
DZIP1	0.137949	0.116812
IKZF4	0.287381	0.116757
ZNF786	0.138113	0.1165
NFKB2	0.193276	0.116282
ZNF609	0.193556	0.116048
ZNF781	0.0398039	0.11582
ZNF275	0.25	0.115703
ZNF511	0.0945455	0.115685
ZNF205	0.14359	0.115247
GLI4	0.0714	0.115025
ZNF572	0.190256	0.11433
ZNF879	0.209667	0.113936
ZNF225	0.208947	0.113383
MEIS1	0.15625	0.113114
THAP8	0.0128889	0.112477
ZNF526	0.045122	0.112468
ETV6	0.0563043	0.112036
CREB3	0.0556604	0.111929
FOXO1	0.0918519	0.111694
ZNF616	0.121622	0.111349
ZBTB21	0.0623684	0.111315
PAX8	0.0627273	0.111283
ESRRA	0.118649	0.111164
ZBTB3	0.0265957	0.110405
ZNF548	0.0534146	0.110195
ZNF766	0.0296552	0.110174
SIX4	0.0471111	0.110156
ZNF646	0.0121622	0.109018
ZNF219	0.097551	0.10882
GZF1	0.0138776	0.108156
SAFB2	0.041	0.107998
NFIA	0.0574419	0.107771
SATB2	0.03375	0.106238
ZNF280B	0.0745833	0.105874
ZNF865	0.055625	0.105632
NCOA1	0.0342857	0.105033
ZNF335	0.0904	0.104603
ZNF124	0.0513043	0.101589
PPARG	0.0528	0.10122
ZBTB26	0.024	0.100697
ZNF629	0.00717949	0.100422
ZNF619	0.0208108	0.0998381
ZNF337	0.0180952	0.0997774
NR2F6	0.0875676	-0.0946126
HOXD1	0.0533333	-0.0946963
L3MBTL4	0.241951	-0.0986359
ZNF276	0.0187179	-0.0986865
MBD1	0.0840816	-0.0989961
ZNF232	0.0171698	-0.100723
MLX	0.0417073	-0.10093
RXRA	0.174324	-0.101495
ZNF827	0.082931	-0.103103
KLF9	0.0446154	-0.105311
ZNF217	0.158095	-0.105466
ZFP64	0.00625	-0.106026
ZNF44	0.015814	-0.106129
ZNF485	0.0074359	-0.106304
SOX5	0.0974359	-0.106385
ZNF556	0.108049	-0.106592
NR1H2	0.00621622	-0.10722
HNF4G	0.0251515	-0.10907
ZNF256	0.0361765	-0.109568
ZNF782	0.01	-0.109829
RBPJ	0.19439	-0.110274
ZNF33B	0.0486667	-0.111684
JUN	0.0245238	-0.111817
MAF1	0.0778261	-0.111964
SOX18	0.00775	-0.112568
ZSCAN12	0.0359459	-0.113787
FOXJ3	0.046	-0.113861
ZNF83	0.0181395	-0.114132
ZNF280C	0.0131818	-0.11419
ZNF333	0.0972549	-0.114482
ZNF598	0.144359	-0.115173
ZFP37	0.0427027	-0.115694
GTF3A	0.0173684	-0.11628
ZNF703	0.00216216	-0.117066
ZNF678	0.0395652	-0.11765
ZNF713	0.0244737	-0.11766
ATF5	0.0212821	-0.118453
ELK1	0.0874419	-0.118893
ZNF318	0.0283871	-0.118982
ZNF614	0.205349	-0.119264
ZNF12	0.131042	-0.119452
ZNF552	0.246512	-0.11954
SMAD1	0.0982353	-0.12016
ZBTB4	0.136538	-0.121055
ZNF85	0.214146	-0.121445
DNMT1	0.2205	-0.121768
ZNF669	0.0284615	-0.122097
ZNF222	0.0902	-0.122254
SMAD9	0.0131111	-0.122517
ZNF25	0.0369231	-0.12281
AHDC1	0.0558	-0.123101
ZNF652	0.00714286	-0.123277
ZBTB39	0.146	-0.124558
CAMTA2	0.209118	-0.125604
ETS1	0.0435294	-0.126175
ZZZ3	0.125789	-0.126209
KLF13	0.0351111	-0.12651
ZNF512B	0.0979167	-0.128954
ZBTB37	0.00822222	-0.129896
ZFP90	0.163077	-0.130104
ZNF644	0.107544	-0.130394
ZNF557	0.3475	-0.131548
SP140L	0.0216	-0.131971
ZFP1	0.191622	-0.132037
LBX2	0.253095	-0.132122
NFATC3	0.0463158	-0.132221
ZNF30	0.101951	-0.132448
ZNF251	0.03	-0.132833
HIC2	0.607391	-0.133284
ZNF576	0.206047	-0.133291
SP110	0.117941	-0.133292
ZNF367	0.00892857	-0.134004
TCF3	0.0286667	-0.134274
NR2F1	0.0138462	-0.134992
ZSCAN22	0.0384615	-0.135241
ZBTB44	0.0538776	-0.136219
FOXO4	0.128333	-0.136731
THRB	0.17	-0.137111
KLF15	0.492857	-0.137833
DBP	0.154222	-0.137922
E2F2	0.0254348	-0.138005
DMTF1	0.0113953	-0.138629
ZNF3	0.00729167	-0.139031
ZBED5	0.263824	-0.139275
CAMTA1	0.0909302	-0.139533
ADNP	0.0178261	-0.14004
RELA	0.552813	-0.140541
MEF2A	0.0311429	-0.140686
ZNF75D	0.0102703	-0.141388
FOXP1	0.132364	-0.141734
MYNN	0.28875	-0.143081
STAT5B	0.111471	-0.144435
THAP1	0.256122	-0.144611
TEAD2	0.0737209	-0.144997
TBP	0.14	-0.146847
NPAS2	0.0977273	-0.147223
HMG20B	0.579512	-0.14904
ZNF800	0.702632	-0.150192
ZHX3	0.372558	-0.150265
ZNF45	0.00560976	-0.150368
ZNF512	0.0720408	-0.150933
MZF1	0.469592	-0.151218
IRF1	0.0810811	-0.152397
ZNF569	0.00804878	-0.152711
ELK4	0.259189	-0.153056
CTCF	0.621569	-0.153156
CREM	0.177414	-0.153426
MTF1	0.0466667	-0.153493
ZNF773	0.5305	-0.15395
ZNF148	0.0413889	-0.154844
GLMP	0.0139583	-0.156013
ZKSCAN8	0.717037	-0.15666
ZNF559	0.298727	-0.157471
ZFP41	0.737308	-0.158979
AHR	0.757963	-0.159167
AKNA	0.154359	-0.160454
EBF1	0.246053	-0.163846
TIGD3	0.612439	-0.164186
USF3	0.221111	-0.164481
ZNF530	0.0075	-0.164873
TTF1	0.724043	-0.16533
FOSL1	0.608235	-0.173306
ZBTB46	0.31814	-0.175122
ZNF101	0.0723077	-0.177295
FAM200B	0.00652174	-0.180178
PRDM4	0.305	-0.181413
PREB	0.36525	-0.184904
ZNF549	0.245641	-0.185782
ZNF490	0.0443243	-0.186596
E2F7	0.37619	-0.191088
ZBTB47	0.399636	-0.192305
HHEX	0.382258	-0.194557
ZBTB1	0.128864	-0.194708
DPF1	0.139118	-0.195356
ZNF140	0.701905	-0.197552
NFE2	0.00806452	-0.201961
RREB1	0.973421	-0.202723
ZNF688	0.0175	-0.204344
TBX3	0.135833	-0.205675
RBAK	0.496591	-0.208917
ZNF17	0.476809	-0.216919
ZNF577	0.190645	-0.217066
NFIB	0.41381	-0.223957
LHX6	0.319143	-0.22856
ZFP14	0.766038	-0.231406
ZNF432	0.0329545	-0.238679
ZNF260	0.101111	-0.244057
ZBTB49	0.815581	-0.244834
ZBTB24	0.641471	-0.246159
ZNF484	0.25075	-0.246226
ZUP1	0.00375	-0.254985
DDIT3	0.0218421	-0.255133
ZNF326	0.1235	-0.261047
MYRF	0.978667	-0.261779
WIZ	1	-0.265154
NR3C1	0.00545455	-0.266859
RFX3	0.946744	-0.276138
ZNF853	0.00282609	-0.291317
RFX1	0.869348	-0.312581
ZNF439	0.038	-0.315013
FOXA1	0.00947368	-0.331661
ZNF334	0.632128	-0.356989
ZNF660	0.879778	-0.374859
YBX3	0.820571	-0.384741
ZBTB22	0.0298214	-0.515882
YBX1	0.00162791	-0.909307
IKZF1	0.052439	-1.0737
REST	1	-1.09281
SCMH1	0.741538	-1.09446
ZNF382	0.321	-1.51394
GPBP1L1	0.61	NA
TCF12	0.217143	NA

## Sheet: Supplemental Table 10
Supplemental Table 10. t-test p-values associated with Figure 2C
	ActivatorBound	Unbound	pvals_ttest
Activator_1-5	42	188	0.00198051
Activator_6-10	81	57	0.032735
Activator_11-20	261	51	0.00449737
Activator_21-30	359	14	0.00786589
Activator_31-40	456	9	0.0443309
Activator_41-50	450	8	0.0363157
Activator_51-100	2127	7	0.0428223
	RepressorBound	Unbound	pvals_ttest
Repressor_1-5	12	218	3.05823e-05
Repressor_6-10	20	118	0.160681
Repressor_11-20	72	240	0.00161449
Repressor_21-30	120	253	0.0183615
Repressor_31-40	140	325	2.93112e-05
Repressor_41-50	200	258	0.00103939
Repressor_51-100	1288	846	1.93228e-11
Repressor_101-200	2184	298	6.57324e-16
Repressor_201-300	770	5	0.01627
	OtherBound	Unbound	pvals_ttest
Other_1-5	10	220	0.92747
Other_6-10	16	122	0.201616
Other_11-20	76	236	0.253601
Other_21-30	156	217	9.31688e-05
Other_31-40	239	226	3.73089e-05
Other_41-50	319	139	0.154046
Other_51-100	1877	257	0.178173
Other_101-200	2473	9	0.428199

[truncated: 12 more sheets: Supplemental Table 11, Supplemental Table 12, Supplemental Table 13, Supplemental Table 14, Supplemental Table 15, Supplemental Table 16, Supplemental Table 17, Supplemental Table 18, Supplemental Table 19, Supplemental Table 20, Supplemental Table 21, Supplemental Table 22]
